# 1            Distinct neural progenitor pools in the ventral 2            telencephalon generate diversity in striatal spiny 3            projection neurons

4  
5 Fran van Heusden<sup>1,3</sup>, Anežka Macey-Dare<sup>1,3</sup>, Rohan N. Krajeski<sup>1</sup>, Andrew Sharott<sup>2</sup>,  
6 Tommas Jan Ellender<sup>1\*</sup>

7  
8 <sup>1</sup> Department of Pharmacology, OX1 3QT, Oxford

9 <sup>2</sup> MRC BNDU, OX1 3TH, Oxford

10 <sup>3</sup> Contributed equally

11

12 \* Corresponding author

13 Tommas Ellender

14 Department of Pharmacology

15 Mansfield Road, OX1 3QT

16 Oxford, United Kingdom

17 [tommas.ellender@pharm.ox.ac.uk](mailto:tommas.ellender@pharm.ox.ac.uk)

18

19 Number of pages: 42

20 Number of Figures: 5

21 Number of Tables: 2

22 Number of Supplemental Figures: 3

23 Wordcount Abstract: 220

24 Wordcount Introduction: 798

25 Wordcount Results: 4370

26 Wordcount Discussion: 1731

27

28 **Keywords:** basal ganglia, striatum, development, embryonic neural progenitors, spiny  
29 projection neurons, apical intermediate progenitors, neural circuits

30

31 **Running title:** Fate mapping of striatal neural progenitors.

32

33 **Conflict of interest:** We declare no conflict of interest.

34

35 **Acknowledgements:** We would like to thank members of the Ellender lab for advice  
36 and comments. We gratefully acknowledge Ulrich Müller and Tarik Haydar for  
37 providing reagents, Peter Somogyi, Peter Magill and Colin Akerman for providing  
38 access to equipment, Ben Micklem for providing technical assistance and Monzilur  
39 Rahman, Rebecca Waterfield, Nicholas Pasternack and Eoin Mac Reamoinn for initial  
40 help. TJE was supported by a MRC Career Development Award (MR/M009599/1)  
41 and AMD by an Imperial College research bursary.

42

43 **Author Contributions:** FvH, AMD and TJE designed the experiments. FvH and TJE  
44 performed the electrophysiology experiments and analysis. FvH, AMD, RNK and AS  
45 performed anatomical experiments and analysis. All authors discussed the data. TJE  
46 wrote the manuscript. No competing interests for any of the authors.

47 **Abstract**

48

49 Heterogeneous populations of neural progenitors in the embryonic lateral ganglionic  
50 eminence (LGE) generate all GABAergic spiny projection neurons (SPNs) found in  
51 the striatum. Here we investigate how this diversity in neural progenitors relates to  
52 diversity of adult striatal neurons and circuits. Using a combination of *in utero*  
53 electroporation to fluorescently pulse-label striatal neural progenitors in the LGE,  
54 brain slice electrophysiology, electrical and optogenetic circuit mapping and  
55 immunohistochemistry, we characterise a population of neural progenitors enriched  
56 for apical intermediate progenitors (aIPs) and a distinct population of other  
57 progenitors (OPs) and their neural offspring. We find that neural progenitor origin has  
58 subtle but significant effects on the properties of striatal SPNs. Although aIP and OP  
59 progenitors can both generate D1-expressing direct pathway as well as D2-expressing  
60 indirect pathway SPNs found intermingled in the striatum, the aIP derived SPNs are  
61 found in more medial aspects of the striatum, exhibit more complex dendritic arbors  
62 with higher spine density and differentially sample cortical input. Moreover,  
63 optogenetic circuit mapping of the aIP derived neurons show that they further  
64 integrate within striatal circuits and innervate both local D1 and D2 SPNs. These  
65 results show that it is possible to fluorescently label distinct neural progenitor pools  
66 within the LGE and provide the first evidence that neural progenitor heterogeneity can  
67 contribute to the diversity of striatal SPNs.

68

69

## 70 **Introduction**

71

72 A fundamental question in neuroscience is how neuronal cell types and neural circuits  
73 arise and what critically guides their development. Recent studies in the dorsal  
74 telencephalon or pallium have highlighted important and distinct roles for embryonic  
75 neural progenitors, at both the level of single neural progenitors (Yu *et al.*, 2009; Yu  
76 *et al.*, 2012; Cadwell *et al.*, 2019) and distinct pools of neural progenitors (Tyler *et al.*  
77 *et al.*, 2015; Ellender *et al.*, 2018), in shaping neuronal identity and synaptic  
78 connectivity. However, much less is known about how embryonic neural progenitors  
79 in the ventral telencephalon or subpallium contribute to the cellular diversity and  
80 neural circuitry found within ventral brain structures. Neural progenitors in the ventral  
81 portions of the embryonic brain can be found in the ganglionic eminences – transitory  
82 structures that generate most interneurons of the brain and the spiny projection  
83 neurons (SPNs) of the striatum (Wonders & Anderson, 2006; Wamsley & Fishell,  
84 2017). In this study we focused on the neural progenitors found within the lateral  
85 ganglionic eminence (LGE) (Graybiel & Ragsdale, 1978; Olsson *et al.*, 1998; Mason  
86 *et al.*, 2005; Pilz *et al.*, 2013; Kelly *et al.*, 2018), which give rise to the striatal SPNs,  
87 and include radial glial cells, basal radial glial cells, subapical progenitors, basal  
88 progenitors and short neural precursors, amongst others (Olsson *et al.*, 1998; Stenman  
89 *et al.*, 2003; Pilz *et al.*, 2013). Many of these are not unique to the LGE and have  
90 previously been characterised in detail in the proliferative zones of the cortex (Noctor  
91 *et al.*, 2001; Noctor *et al.*, 2004; Gal *et al.*, 2006; Kowalczyk *et al.*, 2009; Stancik *et al.*  
92 *et al.*, 2010; Shitamukai *et al.*, 2011; Wang *et al.*, 2011; Franco & Muller, 2013;  
93 Taverna *et al.*, 2014). However, the relative abundance as well as key proliferative  
94 behaviours of many of these progenitors differ between cortex and the LGE (Pilz *et al.*  
95 *et al.*, 2013). Furthermore, it is unknown to what extent these different pools of neural  
96 progenitors contribute to the diversity of striatal projection neurons.

97 To investigate the relationship between neural progenitor pool and striatal  
98 neuron diversity, we used *in utero* electroporation to fluorescently pulse-label two  
99 pools of actively dividing neural progenitors in the LGE distinguished by their  
100 differential expression of the tubulin alpha1 ( $T\alpha 1$ ) promoter (Gal *et al.*, 2006; Stancik  
101 *et al.*, 2010). We find that  $T\alpha 1$ -expressing neural progenitors exhibit many of the  
102 characteristics of the previously described short neural precursors and subapical  
103 progenitors found within the LGE (Pilz *et al.*, 2013), including division in the

104 ventricular zone, lack of basal processes during division and relatively fast cell-cycle  
105 kinetics. In contrast, the non-T $\alpha$ 1-expressing neural progenitors tend to retain their  
106 basal processes during division and exhibit slower cell-cycle kinetics. Overall, our  
107 observations suggest that T $\alpha$ 1-expressing neural progenitors consist of intermediate  
108 progenitors found in apical regions of the LGE such as short neural precursors and  
109 subapical progenitors (Pilz *et al.*, 2013) and we therefore refer to them collectively as  
110 apical intermediate progenitors (aIPs) and the non-T $\alpha$ 1-expressing neural progenitors  
111 consist of all other neural progenitors that are actively dividing at the same time and  
112 we collectively refer to them as other progenitors (OPs). We find that aIP and OP  
113 neural progenitors mainly generate striatal neurons, with all the hallmarks of  
114 GABAergic spiny projection neurons (SPNs) including expression of neurochemical  
115 markers such as CTIP2, but also generate a small number of neurons found within the  
116 olfactory bulb. Using the neurochemical marker PPE we find that both aIP and OP  
117 neural progenitors generate D1-expressing direct pathway as well as D2-expressing  
118 indirect pathway SPNs. Stereological investigation of progenitor derived striatal  
119 neurons shows that aIP derived neurons are on average found in more medial aspects  
120 of the striatum. Whole-cell patch-clamp recordings of aIP and OP derived neurons in  
121 acute striatal slices reveals that their electrical properties are similar and consistent  
122 with those of SPNs. Indeed, subsequent anatomical reconstruction of recorded  
123 neurons confirms that they exhibit all the hallmarks of SPNs, including radially  
124 oriented dendrites with large numbers of spines. Interestingly, we find differences  
125 with aIP derived SPNs exhibiting a greater local dendritic complexity as well as a  
126 higher density of spines. Lastly, using both electrical and optogenetic circuit mapping  
127 we find that both aIP and OP derived SPNs integrate within striatal circuits. Firstly,  
128 both receive excitatory glutamatergic input from cortex with aIP derived SPNs  
129 exhibiting a significantly prolonged response to cortical activation. Secondly, aIP  
130 derived SPNs form local GABAergic inhibitory synaptic connections with  
131 neighbouring D1 and D2 SPNs.

132 In conclusion, this study shows it is possible to label distinct pools of neural  
133 progenitors in the LGE and suggests that neural progenitor heterogeneity contributes  
134 to striatal diversity in that neural progenitor origin has subtle but significant effects on  
135 the spatial distribution of striatal neurons, their morphology as well as their sampling  
136 of excitatory inputs.

137

138

## 139 Results

140

### 141 *The LGE of the ventral telencephalon contains tubulin alpha1 (Tα1) expressing* 142 *neural progenitors*

143 To investigate the relationship between the diverse pools of neural progenitors in the  
144 LGE and their contribution to striatal neuronal identity and connectivity we  
145 performed *in utero* electroporation (IUE) to fluorescently label actively dividing  
146 progenitors in the ventricular zone (Stancik *et al.*, 2010). Two DNA constructs were  
147 electroporated into the LGE: a Tα1-cre construct in which cre recombinase is under  
148 the control of a portion of the Tα1 promoter (Stancik *et al.*, 2010), and a CβA-FLEx  
149 reporter construct that incorporates a flexible excision (FLEx) cassette where cre  
150 recombination permanently switches expression from TdTomato fluorescent protein  
151 to enhanced green fluorescent protein (GFP) (Franco *et al.*, 2012).

152 We find that 24 hours after IUE the LGE contains both GFP and TdTomato  
153 expressing cells, consisting of Tα1-expressing (Tα1<sup>+</sup>) and non-Tα1-expressing (Tα1<sup>-</sup>)  
154 neural progenitors and young migrating neurons (**Figure 1A**). We find that the time of  
155 IUE influenced the relative proportion of GFP and TdTomato expressing cells seen 24  
156 hours later, with IUE at E15.5 resulting in a greater number of Tα1<sup>+</sup>/GFP<sup>+</sup> cells  
157 (E12.5: 4.8 ± 4.1% and E15.5: 34.5 ± 3.0%, Mann-Whitney test, p=0.002, n = 7 and  
158 17 embryonic brains, **Figure 1B**), suggesting that, similar to their cortical  
159 counterparts (Stancik *et al.*, 2010; Ellender *et al.*, 2018) Tα1-expressing progenitors  
160 form a considerable population of actively proliferating cells during later periods of  
161 neurogenesis.

162 Using IUE at E15.5 we next investigated the spatial distribution of Tα1<sup>+</sup>/GFP<sup>+</sup>  
163 and Tα1<sup>-</sup>/TdTomato<sup>+</sup> cells within the LGE to further characterize these cells and gain  
164 insight into their proliferative behaviour. Firstly, we assessed the location of all  
165 Tα1<sup>+</sup>/GFP<sup>+</sup> and Tα1<sup>-</sup>/TdTomato<sup>+</sup> cells and dividing progenitors relative to the  
166 ventricular wall 24 hours after IUE (**Figure 1C and D**). Tα1<sup>+</sup>/GFP<sup>+</sup> and Tα1<sup>-</sup>  
167 /TdTomato<sup>+</sup> cells can be found interspersed in the proliferative zone of the LGE with  
168 the Tα1<sup>+</sup>/GFP<sup>+</sup> labeled cells on average significantly further away from the  
169 ventricular wall than the Tα1<sup>-</sup>/TdTomato<sup>+</sup> labeled cells (Tα1<sup>+</sup>/GFP<sup>+</sup>: 66.24 ± 3.57 μm  
170 and Tα1<sup>-</sup>/TdTomato<sup>+</sup>: 56.45 ± 2.90 μm, paired t-test, p=0.0055, n = 30, **Figure 1C**).  
171 However, when we limited analysis to only actively dividing progenitor cells, labeled

172 with the mitotic marker phospho-histone H3 (pH3), no difference was seen in their  
173 distance from the ventricle ( $T\alpha 1^{+}/GFP^{+}$ :  $52.28 \pm 6.21 \mu\text{m}$  and  $T\alpha 1^{-}/TdT\text{omato}^{+}$ :  $48.78$   
174  $\pm 3.99 \mu\text{m}$ ,  $p=0.586$ , paired t-test,  $n = 16$  brains, **Figure 1D**). These results are  
175 consistent with both  $T\alpha 1^{+}/GFP^{+}$  and  $T\alpha 1^{-}/TdT\text{omato}^{+}$  progenitors dividing mainly  
176 within the ventricular zone of the LGE (Pilz *et al.*, 2013). Furthermore, our results  
177 suggest that 24 hours after IUE  $T\alpha 1^{+}/GFP^{+}$  cells, likely consisting of young migrating  
178 neurons and non-dividing neural progenitors, inhabit increasingly subapical positions  
179 within the LGE. Whereas in the cortex young migrating neurons mostly exhibit radial  
180 migration (Noctor *et al.*, 2001) newly born neurons in the striatum undergo tangential,  
181 radial and other forms of migration (Halliday & Cepko, 1992; Tan & Breen, 1993;  
182 Reid & Walsh, 2002; Tinterri *et al.*, 2018). Indeed, when we look at the average  
183 dispersion of all labeled cells in a subset of brain slices along two axis perpendicular  
184 to the ventricular wall we find a positive linear correlation between the amount of  
185 horizontal and vertical spread of labeled cells ( $R=0.56$ ,  $p=0.00004$ ,  $n=26$  slices) which  
186 is similar for both  $T\alpha 1^{+}/GFP^{+}$  and  $T\alpha 1^{-}/TdT\text{omato}^{+}$  cells ( $p>0.05$ ) and is not seen  
187 when we limit the analysis to only actively dividing neural progenitors ( $R=0.24$ ,  
188  $p=0.18$ ,  $n=20$  slices, **Figure 1E**). Lastly, the LGE has also been shown to consist of  
189 several domains depending on differential expression of certain transcription factors  
190 (Stenman *et al.*, 2003; Flames *et al.*, 2007; Xu *et al.*, 2018). When we split the LGE in  
191 4 different domains we find that both  $T\alpha 1^{+}/GFP^{+}$  and  $T\alpha 1^{-}/TdT\text{omato}^{+}$  cells can be  
192 found in all progenitor domains of the LGE (**Supplemental Figure 1**).

193 We next investigated the morphology of actively dividing neural progenitors  
194 in the LGE. The distinguishing features of short neural precursors in the dorsal and  
195 ventral telencephalon are their division at the ventricular wall and their short  
196 morphology during division lacking a prominent basal process contacting pial  
197 surfaces (Gal *et al.*, 2006; Stancik *et al.*, 2010; Pilz *et al.*, 2013; Ellender *et al.*, 2018).  
198 Indeed, when we look at the morphology of labeled neural progenitors we find that  
199 many actively dividing  $T\alpha 1^{+}/GFP^{+}$  progenitors exhibit a short rounded morphology  
200 during division and could be found at the ventricular wall (**Figure 1F**). However,  
201 some  $T\alpha 1^{+}/GFP^{+}$  progenitors divide slightly away from the ventricular wall  
202 resembling subapical progenitors (Pilz *et al.*, 2013) (**Figure 1F**). In contrast, many  
203 actively dividing  $T\alpha 1^{-}/TdT\text{omato}^{+}$  progenitors retained their basal process during  
204 division and could be found either at or away from the ventricular wall (**Figure 1G**).  
205 This was confirmed quantitatively by assessment of the number of cells in the VZ that

206 retained a basal process. Overall, we find that  $T\alpha 1^{+}/GFP^{+}$  cells often lacked a basal  
207 process in contrast to  $T\alpha 1^{-}/TdTomato^{+}$  cells that retained theirs ( $T\alpha 1^{+}/GFP^{+}$ :  $20.6 \pm$   
208  $4.7\%$  and  $T\alpha 1^{-}/TdTomato^{+}$ :  $35.9 \pm 7.8\%$ ,  $p=0.03$ , Wilcoxon signed rank test,  $n = 15$   
209 brains, **Figure 1H**).

210 A further distinguishing characteristic of both short neural precursors and  
211 subapical progenitors found in the LGE is their relatively fast cell cycle kinetics (Pilz  
212 *et al.*, 2013). To investigate whether the  $T\alpha 1^{+}/GFP^{+}$  progenitor population exhibits  
213 fast cell cycle durations we performed IUE at E15.5 and subsequently fixed tissue at  
214 varying delays ranging from 12 to 26 hours and labeled dividing neural progenitors  
215 with the mitotic marker pH3 (Stancik *et al.*, 2010). Consistent with the fast cell cycle  
216 kinetics described for the short neural precursors and subapical progenitors in the  
217 LGE we find that the  $T\alpha 1^{+}/GFP^{+}$  progenitors return to G1/S phase faster than the  $T\alpha 1^{-}$   
218  $/TdTomato^{+}$  progenitors. Indeed, after a 16 hour delay  $T\alpha 1^{+}/GFP^{+}$  progenitors are the  
219 dominant population of pH3 expressing cells ( $T\alpha 1^{+}/GFP^{+}$ :  $19.85 \pm 7.15\%$  and  $T\alpha 1^{-}$   
220  $/TdTomato^{+}$ :  $5.18 \pm 1.72\%$ , t-test,  $p = 0.025$ ,  $n = 6$  brains) whereas after a 20 hour  
221 delay it is the  $T\alpha 1^{-}/TdTomato^{+}$  progenitors which form the dominant population of  
222 pH3 expressing cells ( $T\alpha 1^{+}/GFP^{+}$ :  $4.98 \pm 2.11\%$  and  $T\alpha 1^{-}/TdTomato^{+}$ :  $15.81 \pm$   
223  $3.63\%$ , t-test,  $p = 0.036$ ,  $n = 8$  brains, **Figure 1I**).

224 In conclusion, our results suggest that the LGE in the ventral telencephalon  
225 contains a population of  $T\alpha 1$ -expressing neural progenitors that share many  
226 characteristics with short neural precursors and subapical progenitors previously  
227 described (Pilz *et al.*, 2013), including a ventricular location of division, a short round  
228 morphology during division and fast cell-cycle kinetics. In contrast we are also able to  
229 label a population of neural progenitor that does not express  $T\alpha 1$  that share many  
230 characteristics with radial glial cells (Pilz *et al.*, 2013) and which tend to retain its  
231 basal process and exhibits slower cell cycle kinetics.

232

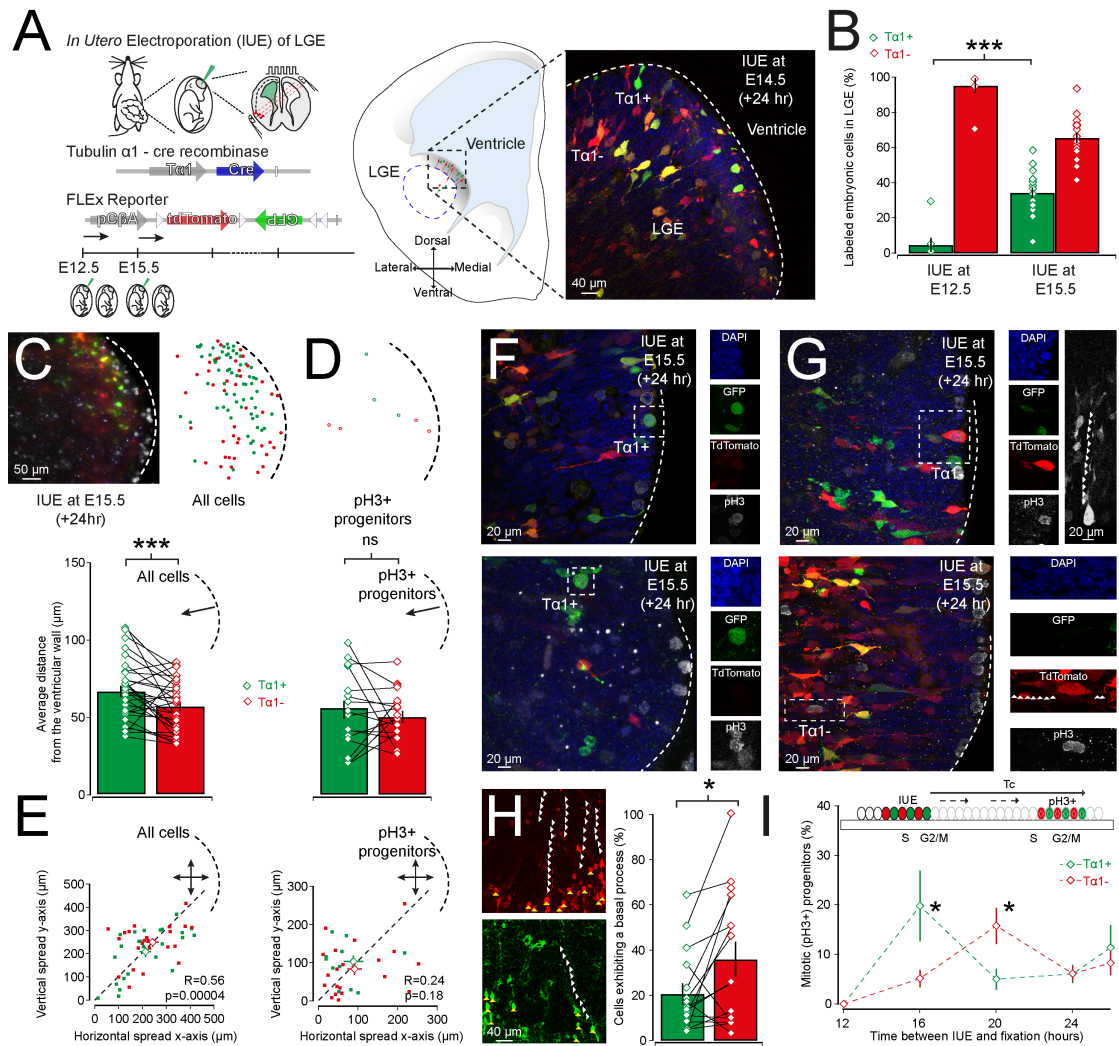

233

234

235

236 **Figure 1: The LGE contains both Ta1-expressing and non-Ta1-expressing**

237 **neural progenitors.** (A) *In utero* electroporation (IUE) of Ta1-cre and FLEX reporter

238 plasmids was performed at embryonic day (E)12.5 and E15.5 to label Ta1-positive

239 (Ta1<sup>+</sup>) and Ta1-negative (Ta1<sup>-</sup>) neural progenitors lining the ventricular wall of the

240 LGE with respectively the fluorescent markers GFP or TdTomato (left). 24 hours

241 after IUE fluorescently labeled Ta1<sup>+</sup>/GFP<sup>+</sup> and Ta1<sup>-</sup>/TdTomato<sup>+</sup> neural progenitors

242 and young neurons can be found in the LGE (right). Yellow cells were assumed

243 to have undergone recombination relatively recently and counted as GFP<sup>+</sup>. (B)

244 Quantification of Ta1<sup>+</sup>/GFP<sup>+</sup> and Ta1<sup>-</sup>/TdTomato<sup>+</sup> cells reveals that the Ta1<sup>+</sup>/GFP<sup>+</sup>

245 cells form a substantial population during late stages of embryogenesis. (C) The

246 distance from the ventricle of Ta1<sup>+</sup>/GFP<sup>+</sup> and Ta1<sup>-</sup>/TdTomato<sup>+</sup> cells 24 hours after

247 IUE differs in that Ta1<sup>+</sup>/GFP<sup>+</sup> cells are located significantly further away from the

248 ventricular wall. (D) A difference in distance from the ventricle is not seen for

249 actively dividing Ta1<sup>+</sup>/GFP<sup>+</sup> and Ta1<sup>-</sup>/TdTomato<sup>+</sup> cells. (E) Horizontal and vertical

250 migration of all labeled cells exhibits a linear correlation (left) whereas this is not the

251 case for actively dividing progenitors (right). (F) Actively dividing Ta1<sup>+</sup>/GFP<sup>+</sup>

252 progenitors exhibiting a short morphology and lacking a basal endfoot can be found



253 dividing at the ventricular wall (top) and at a small distance from ventricle (bottom),  
254 corresponding to respectively a short neural precursor and subapical progenitor. **(G)**  
255 In contrast, dividing  $T\alpha 1^{-}/TdT\text{omato}^{+}$  cells predominantly retain a basal process  
256 during division and can be found dividing at both the ventricular wall (top) and at a  
257 distance from the ventricle (bottom) corresponding to respectively a radial glial cell  
258 and bipolar radial glial cell. **(H)** Quantification of cells in the proliferative zones of  
259 the LGE containing a basal process. Note that significantly more  $T\alpha 1^{-}/TdT\text{omato}^{+}$   
260 cells retain a basal process. **(I)** Estimation of cell cycle duration using embryonic  
261 tissue fixed at variable delays after IUE and labeling for the mitotic marker phospho-  
262 histone H3 (pH3). A rapid increase in the number of neural progenitors that were  
263 positive of the marker pH3 was taken as a return to the mitotic ('M') phase for that  
264 population of neural progenitors and a proxy for the cell cycle duration ('Tc').

265  
266

### 267 ***Both progenitor pools can generate striatal D1 and D2 spiny projection neurons***

268 Our *in utero* electroporation labeling experiments suggest that  $T\alpha 1$  expression can  
269 distinguish between two pools of neural progenitor in the LGE. The  $T\alpha 1$ -expressing  
270 neural progenitors exhibit many of the characteristics of described short neural  
271 precursors and subapical progenitors whereas, in contrast, the non- $T\alpha 1$ -expressing  
272 neural progenitors tend to share many characteristics with the described radial glial  
273 cells within the LGE (Pilz *et al.*, 2013). Overall, our observations would suggest the  
274 pool of  $T\alpha 1$ -expressing neural progenitors is enriched for apically dividing  
275 intermediate progenitors and therefore we will refer to them collectively as apical  
276 intermediate progenitors (aIPs) and the neurons they generate as aIP derived and the  
277 non- $T\alpha 1$ -expressing neural progenitors consist of all other neural progenitors that are  
278 actively dividing at the same time and we will refer to them collectively as other  
279 progenitors (OPs) and the neurons they generate as OP derived.

280 When we let the electroporated embryos develop postnatally we observe many  
281 GFP and TdTomato expressing neurons spread throughout the striatum (**Figure 2B**).  
282 The GFP expressing neurons are generated from the population of aIP neural  
283 progenitors and are referred to as aIP derived and the TdTomato expressing neurons  
284 from the population of OP neural progenitors and are referred to as OP derived  
285 (**Figure 2B**). At higher magnifications both pools of labeled neurons exhibit the  
286 morphology of striatal spiny projection neurons (SPNs) including dendrites densely  
287 covered with spines (**Figure 2B**). The relative proportion of aIP and OP derived  
288 neurons seen postnatally is very similar to the ratio of labeled embryonic neural  
289 progenitors found 24 hours after IUE at E15.5, with a significantly larger proportion

290 of OP derived neurons (aIP derived:  $36.7 \pm 5.5\%$  and OP derived:  $63.3 \pm 5.5\%$ ,  
291  $p=0.0017$ , paired t-test,  $n = 16$  brains, **Figure 2C**). We next investigated the spatial  
292 distribution of aIP and OP derived neurons in rostral, central and caudal sections of  
293 the striatum in a total of 15 electroporated brains (**Supplemental Figure 2**). In  
294 general, across all sections we find that the normalised position (see **Methods**) of all  
295 labeled SPNs was biased to the medial aspects (Wilcoxon Sign Rank,  $p = 0.000005$ ,  $n$   
296  $= 15$  mice / 23 sections, **Figure 2D**), but not to either dorsal or ventral aspects of the  
297 striatum (Wilcoxon Sign Rank,  $p > 0.05$ ). We find that within individual sections the  
298 average location of aIP derived and OP derived neurons differ suggesting that they  
299 might exhibit different migration patterns (Halliday & Cepko, 1992; Tan & Breen,  
300 1993; Reid & Walsh, 2002; Tinterri *et al.*, 2018). Although this likely is not captured  
301 fully in coronal slices, we nonetheless find that aIP derived neurons were  
302 approximately twice as likely to be statistically biased (Wilcoxon Sign rank,  $p <$   
303  $0.016$ ) towards the medial aspect of striatum (73% of sections) than OP derived  
304 neurons (37% of sections) with the strongest medial bias seen in the central and  
305 caudal planes (**Supplemental Figure 2**).

306 We next investigated which types of striatal SPN were labeled. Combining  
307 immunocytochemistry for the marker for spiny projection neurons CTIP2 (Arlotta *et*  
308 *al.*, 2008) and the marker for D2 SPNs PPE (Gerfen *et al.*, 1990) we investigated the  
309 degree of co-localization of these markers with our aIP and OP derived striatal  
310 neurons (**Figure 2E**). We find that nearly all labeled neurons co-localize with CTIP2  
311 (aIP derived/CTIP2<sup>+</sup>:  $99.6 \pm 0.4\%$  and OP derived/CTIP2<sup>+</sup>:  $99.4 \pm 0.3\%$ , both  $n = 9$ ,  
312 **Figure 2F**) suggesting the labeled neurons are SPNs. Secondly, labeling for the D2  
313 SPN marker PPE reveals that both progenitor pools can generate both PPE<sup>-</sup> D1-  
314 expressing direct pathway SPNs and PPE<sup>+</sup> D2-expressing indirect pathway SPNs (aIP  
315 derived/PPE<sup>+</sup>:  $35.2 \pm 7.0\%$  and OP derived/PPE<sup>+</sup>:  $48.2 \pm 5.3\%$ ,  $n = 9$ ) with a trend for  
316 the aIP progenitor pool to generate more PPE<sup>-</sup> D1 SPNs (vs. 50%,  $p < 0.071$ , one-  
317 sample t-test,  $n = 8$ ). Lastly, we asked whether SPNs derived from these distinct  
318 progenitor pools end up in different compartments of the striatum. We used antibody  
319 staining against the  $\mu$ -opioid receptor (MOR) to delineate the MOR-rich patches and  
320 the MOR-poor matrix compartments of the striatum (**Figure 2G**). We find that on  
321 average only 6% of labeled neurons can be found in the striatal patches with the  
322 remainder found in the matrix with no difference between aIP and OP derived  
323 neurons (aIP/MOR<sup>+</sup>:  $4.8 \pm 1.3\%$  and OP/MOR<sup>+</sup>:  $7.8 \pm 1.6\%$ ,  $n = 12$ , **Figure 2H**). As

324 different embryonic stages have been shown to differently contribute to the formation  
325 of the striatal neurons and compartments (Brand & Rakic, 1979; Graybiel & Hickey,  
326 1982; Marchand & Lajoie, 1986; van der Kooy & Fishell, 1987; Fishell *et al.*, 1990;  
327 Newman *et al.*, 2015; Kelly *et al.*, 2018; Tinterri *et al.*, 2018) we repeated these  
328 experiment using IUE at E12.5 (**Supplemental Figure 3**). We find broadly similar  
329 results in that the proportion of labeled adult neurons reflect the ratio of embryonic  
330 progenitors with less aIP derived neurons labeled during this earlier stage of  
331 neurogenesis (aIP derived:  $6.6 \pm 4.0\%$  and OP derived:  $93.4 \pm 4.0\%$ ,  $n = 10$ ,  
332 **Supplemental Figure 3B**), virtually all labeled neurons express the SPN marker  
333 CTIP2 (aIP derived/CTIP2<sup>+</sup>:  $100.0 \pm 0.0\%$  and OP derived/CTIP2<sup>+</sup>:  $99.2 \pm 0.5\%$ ,  $n =$   
334  $6$ , **Supplemental Figure 3C**) and both progenitor populations can generate putative  
335 D1-expressing direct pathway SPNs and D2-expressing indirect pathway SPNs (aIP  
336 derived/PPE<sup>+</sup>:  $19.2 \pm 3.6\%$  and OP-derived/PPE<sup>+</sup>:  $34.0 \pm 6.0\%$   $n = 8$ , **Supplemental**  
337 **Figure 3D**). However, labeling at this younger embryonic age seems to generate  
338 fewer indirect pathway D2 SPNs (E12.5 vs. E15.5, Mann-Whitney test,  $p = 0.037$ ;  $n =$   
339  $8$  and  $12$ ) and slightly more labeled neurons in MOR<sup>+</sup> patches (E12.5:  $12.4 \pm 2.4\%$   
340 and E15.5:  $7.0 \pm 1.3\%$  in MOR<sup>+</sup> patches; Mann-Whitney test,  $p = 0.170$ ,  $n = 4$  and  $12$ ,  
341 **Supplemental Figure 3E**). Lastly, the LGE has been shown to not only generate  
342 striatal SPNs, but has also been shown to generate interneurons found in the olfactory  
343 bulb (Stenman *et al.*, 2003). Therefore, we investigated whether we could find labeled  
344 neurons also in the olfactory bulb in a small subset of mice that had undergone IUE at  
345 E15.5. We did find small numbers of labeled neurons in sections of the olfactory bulb  
346 (~40 neurons per section) with the majority being OP derived (aIP derived olfactory  
347 bulb interneurons:  $3.9 \pm 0.7\%$  and OP derived olfactory bulb interneurons:  $96.1 \pm 0.7$ ,  
348  $n = 5$  brains, **Supplemental Figure 4**).

349 Overall, these results suggest that aIP and OP neural progenitors in the LGE  
350 mainly generate D1 and D2 spiny projection neurons, which can be found  
351 intermingled in the striatum as well as in patch and matrix compartments.  
352 Furthermore, a small number of olfactory bulb neurons are generated mainly from the  
353 population of OP neural progenitors.

354  
355

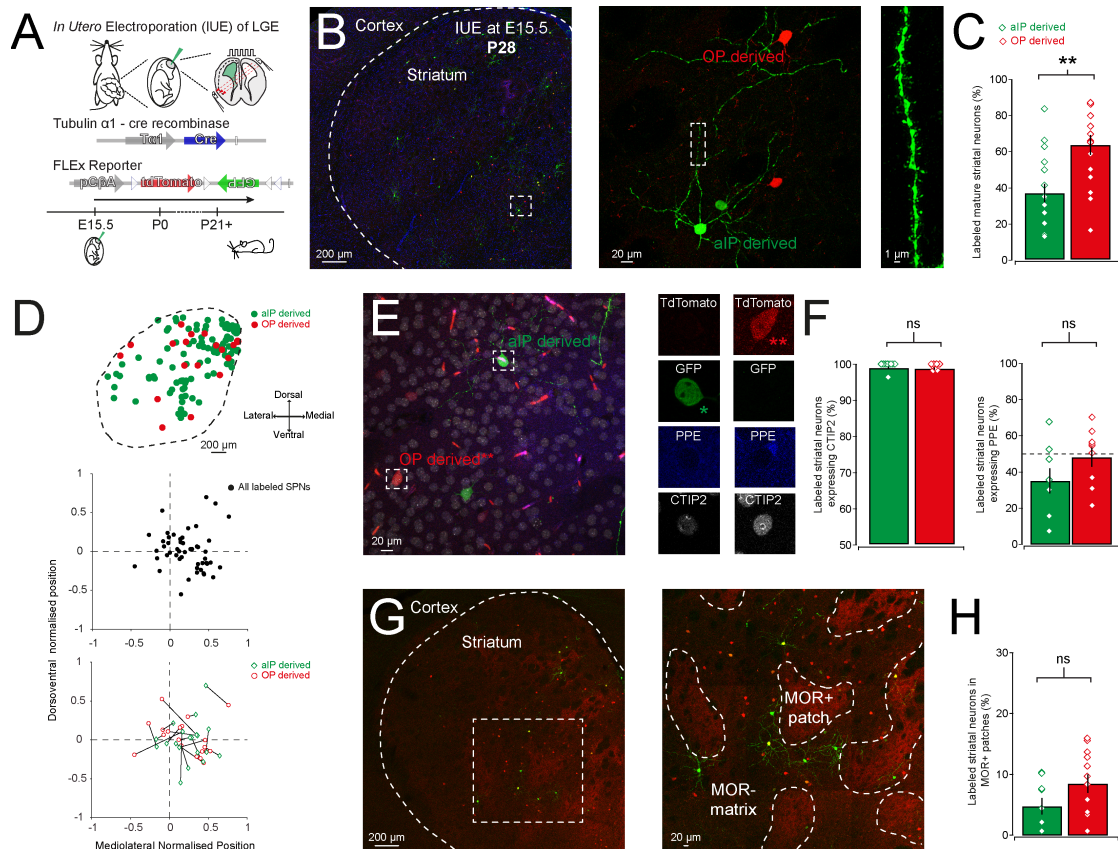

356

357

358

359 **Figure 2: Both aIP and OP neural progenitors in the LGE can generate D1 and**

360 **D2 striatal spiny projection neurons.** (A) Mice that underwent IUE at E15.5 with

361  $T\alpha 1$ -cre and FLEX reporter plasmids were left to grow up until young adulthood

362 (postnatal day 21 and over). (B) The striatum of these mice contain both GFP<sup>+</sup> and

363 TdTomato<sup>+</sup> neurons derived from respectively a pool of apical intermediate

364 progenitors (aIPs) or other progenitors (OPs). The adult neurons derived from both

365 progenitor pools display the radial morphology and spine studded dendrites (right)

366 characteristic of striatal spiny projection neurons (SPNs). (C) Quantification of the

367 relative proportion of aIP and OP derived striatal neurons reveals a similar

368 distribution as the respective embryonic neural progenitors at E15.5. Note the

369 significantly larger proportion of OP derived neurons. (D) Example diagram of

370 location of aIP and OP derived neurons in a central section of the striatum (top).

371 Normalised mediolateral and dorsoventral positions of all labeled neurons across all

372 counted sections reveals that labeled neurons inhabit more medial aspects of the

373 striatum (middle). Normalised mediolateral and dorsoventral positions of aIP and OP

374 derived neurons within individual sections, linked with lines, shows that in many

375 sections they reside in different striatal regions (bottom). (E) An example image of

376 striatum containing aIP and OP derived neurons and labeled for the SPN marker

377 CTIP2 (white) and the D2-SPN marker PPE (blue). The red streaks result from auto-

378 fluorescence of blood vessels. (F) Virtually all labeled neurons are positive for the

379 SPN marker CTIP2 and both aIP and OP derived neurons consist of PPE positive

380 (D2) and PPE negative (putative D1) SPNs. (G) Labeling for the  $\mu$ -opioid receptor  
381 (MOR) reveals that aIP and OP derived neurons can be found in both MOR<sup>+</sup> patch  
382 and MOR<sup>-</sup> matrix compartments. (H) Quantification of aIP and OP derived neurons  
383 labeled for MOR reveals both can be found within MOR<sup>+</sup> patches in equal numbers.

384

385

386 ***Both aIP and OP derived neurons have electrical and morphological properties***  
387 ***consistent with SPNs.***

388 So far we have shown that we can pulse-label two different pools of neural  
389 progenitors in the LGE and that both pools can generate D1 and D2 striatal SPNs  
390 based on their neurochemical profile. We next investigated in more detail whether the  
391 labeled neurons exhibit the electrophysiological and morphological properties of  
392 SPNs. To do this we performed whole-cell patch-clamp recordings of aIP and OP  
393 derived neurons as well as unlabeled neurons in dorsal striatum (**Figure 3A**). The  
394 inclusion of biocytin in the intracellular solution allowed for post-hoc labeling and  
395 reconstruction of recorded cells (**Figure 3B and C**). We investigated a variety of  
396 electrophysiological properties, including membrane potential (aIP derived:  $-80.3 \pm$   
397  $1.2$  mV, OP derived:  $-78.9 \pm 0.7$  mV and unlabeled:  $-78.3 \pm 1.2$  mV;  $p > 0.05$ , t-test,  $n$   
398 = 15, 34 and 18 neurons), input resistance (aIP derived:  $88.1 \pm 8.4$  M $\Omega$ , OP derived:  
399  $81.0 \pm 4.7$  M $\Omega$  and unlabeled:  $80.3 \pm 7.5$  M $\Omega$ ;  $p > 0.05$ , t-test), action potential  
400 threshold (aIP derived:  $-41.6 \pm 1.8$  mV, OP derived:  $-39.8 \pm 0.9$  mV and unlabeled:  $-$   
401  $39.5 \pm 1.2$  mV;  $p > 0.05$ , t-test) as well as action potential frequency, which all  
402 suggested that labeled neurons exhibited electrical properties consistent with those of  
403 SPNs. However, we did not observe significant differences in these or other  
404 electrophysiological properties between aIP and OP derived neurons (**Figure 3D** and  
405 **Table 1**).

406

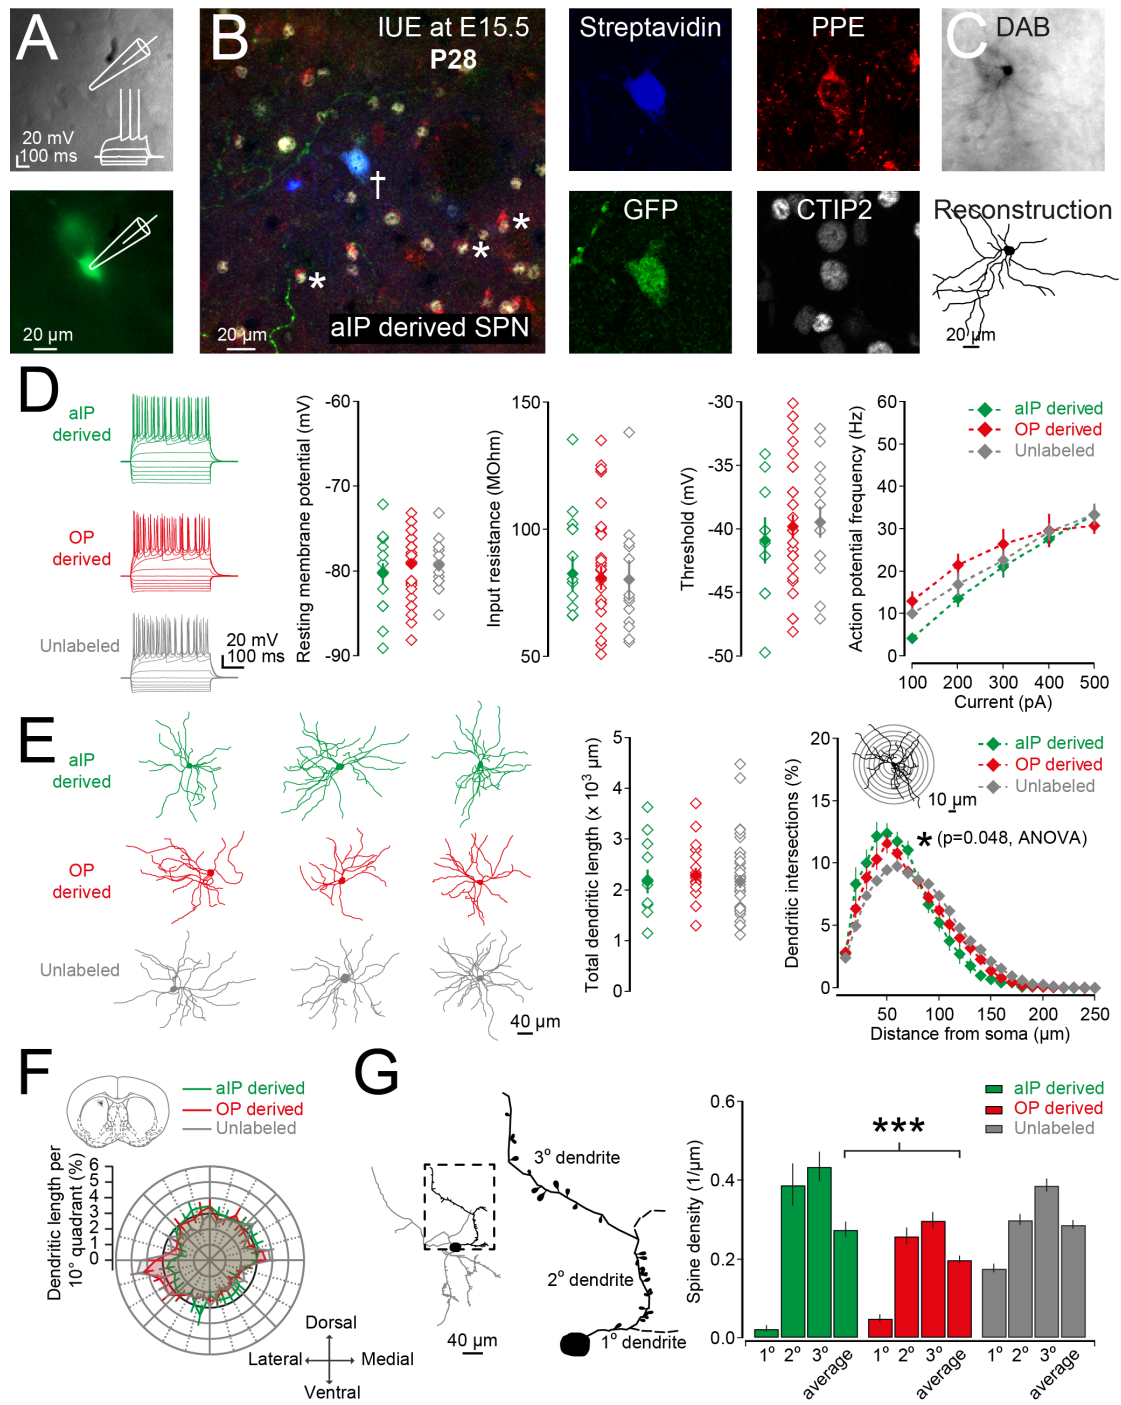

407

408

409 **Figure 3: aIP derived SPNs exhibit greater dendritic complexity and spine**  
 410 **density.** (A) Electrophysiological properties of progenitor-derived striatal neurons  
 411 were assessed using whole-cell patch-clamp recordings in acute brain slices. Example  
 412 Dodt contrast image (top) and fluorescence image (bottom) of a recorded  
 413 GFP<sup>+</sup> neuron. Inset: response of the neuron to hyperpolarizing and depolarizing  
 414 current steps consistent with that of a SPN. (B) Recorded cells were labeled with  
 415 biocytin during recordings and revealed using streptavidin-Alexafluor405 conjugated  
 416 antibodies in fixed tissue (indicated with a cross) and tested for the expression of the  
 417 SPN marker CTIP2 and the D2 SPN marker PPE. Indicated with white asterisks are

418 neighboring CTIP2<sup>+</sup> and PPE<sup>+</sup> neurons. (C) Recorded cells were further processed for  
419 DAB immunohistochemistry allowing for reconstruction of their dendritic arbors as  
420 well as spine counts. (D) Hyperpolarizing and depolarizing current steps were used to  
421 characterise the electrophysiological properties of aIP derived, OP derived and  
422 unlabeled striatal neurons. The electrophysiological properties were consistent with  
423 those of SPNs and no significant differences were found between either group in their  
424 resting membrane potential, input resistance, spike threshold or action potential  
425 frequency. (E) Example reconstructions of DAB processed aIP derived (top), OP  
426 derived (middle) as well as unlabeled SPNs (bottom). The total dendritic length of the  
427 different SPNs did not differ. Assessment of dendritic complexity using Scholl  
428 analysis reveals that aIP derived neurons exhibit a subtle but significant larger  
429 dendritic complexity close to the soma. (F) Dendritic polarity analysis reveals that all  
430 SPNs exhibit a similar radial morphology. (G) Quantification of the number of spines  
431 on the primary (1°), secondary (2°) and tertiary (3°) dendrites reveals that aIP derived  
432 neurons exhibit an overall higher density of spines as compared to OP derived  
433 neurons.

434

435

436 We next investigated the morphological properties of the SPNs derived from aIP and  
437 OP progenitors. Recorded cells were post hoc processed for DAB  
438 immunohistochemistry allowing for reconstruction of their dendritic arbors as well as  
439 quantification of dendritic spines (**Figure 3E - G**). Comparing the total dendritic  
440 length we did not find significant differences in the length of their dendrites (aIP  
441 derived:  $2184.7 \pm 228.8 \mu\text{m}$ , OP derived:  $2299.3 \pm 147.2 \mu\text{m}$  and unlabeled neurons:  
442  $2182.6 \pm 129.3 \mu\text{m}$ ;  $p=0.626$ , Kruskal-Wallis H test,  $n = 11, 16$  and  $35$  neurons,  
443 **Figure 3E**). We next investigated the dendritic complexity using Scholl analysis and  
444 find that all neurons exhibit the greatest dendritic complexity close to the soma ( $\sim 50$   
445  $\mu\text{m}$  distance) with a small but significant greater complexity for aIP derived over OP  
446 derived neurons ( $p=0.048$ , ANOVA,  $n = 11$  and  $16$ , **Figure 3E**). Polarity analysis  
447 shows that the orientation of the dendrites is not significantly different between aIP  
448 derived, OP derived or unlabeled neurons and that all exhibit a radial morphology  
449 (**Figure 3F**). Quantification of dendritic spines on the primary, secondary and tertiary  
450 dendritic segments reveal that the aIP derived SPNs have a higher density of spines  
451 than the OP derived SPNs (average aIP derived:  $0.28 \pm 0.02$  spines/ $\mu\text{m}$  and average  
452 OP derived:  $0.20 \pm 0.01$  spines/ $\mu\text{m}$ , t-test,  $p=0.0058$ ,  $n = 13$  and  $28$ , **Figure 3G**).

453 Combined these results suggest that both aIP and OP derived neurons exhibit  
454 all the electrical and morphological hallmarks of striatal SPNs. Furthermore, they

455 show that subtle differences can be detected in the morphological properties of  
456 neurons derived from different progenitor pools (Guillamon-Vivancos *et al.*, 2019) in  
457 that aIP derived neurons exhibit greater local dendritic complexity and a higher  
458 density of dendritic spines.

459

460

#### 461 *Integration of progenitor derived striatal SPNs into striatal neural circuits*

462 We next asked to what extent aIP and OP derived neurons are integrated within the  
463 circuits of the basal ganglia and striatum. To do this we performed IUE at E15.5 to  
464 label both aIP derived and OP derived SPNs and examined both the synaptic inputs  
465 and outputs of labeled SPNs. We first investigated to what extent aIP and OP derived  
466 SPNs sample cortical afferents. Cortical afferents were activated using a stimulating  
467 electrode placed in the external capsule while recording from both aIP and OP derived  
468 neurons in the striatum (**Figure 4B**). All experiments were performed in the presence  
469 of GABA receptor antagonists to avoid erroneous activation of GABAergic afferents  
470 (see **Methods**). We find that aIP derived and OP derived SPNs exhibit similar  
471 amplitude EPSPs (aIP derived:  $1.70 \pm 0.44$  mV and OP derived:  $2.08 \pm 0.62$  mV,  
472  $p=0.974$ , Mann Whitney test,  $n = 12$  and  $10$ , **Figure 4D**) and that these do not differ  
473 from amplitudes found in unlabeled SPNs (unlabeled:  $1.50 \pm 0.33$  mV, aIP vs  
474 unlabeled:  $p=0.648$  and OP vs unlabeled:  $p=0.650$ ). However, we find that the  
475 duration and decay time of the EPSPs are significantly longer in the aIP derived  
476 neurons (**Table 2**) suggesting they might contain different configurations of glutamate  
477 receptors.

478 We next asked to what extent these progenitor derived neurons innervate  
479 neighbouring SPNs and in particular whether aIP derived neurons similarly innervate  
480 the D1-expressing direct pathway and D2-expressing indirect pathway SPNs. We  
481 used electroporation of T $\alpha$ 1-cre and creON-mCherry plasmids (Saunders *et al.*, 2012)  
482 at E15.5 to selectively express the light-activatable channel ChR2 in aIP derived  
483 neurons in C57Bl/6 and D1 or D2-GFP transgenic mice with the latter facilitating the  
484 classification of patched neurons as either D1 or D2 SPNs (**Figure 5A**).

485

486



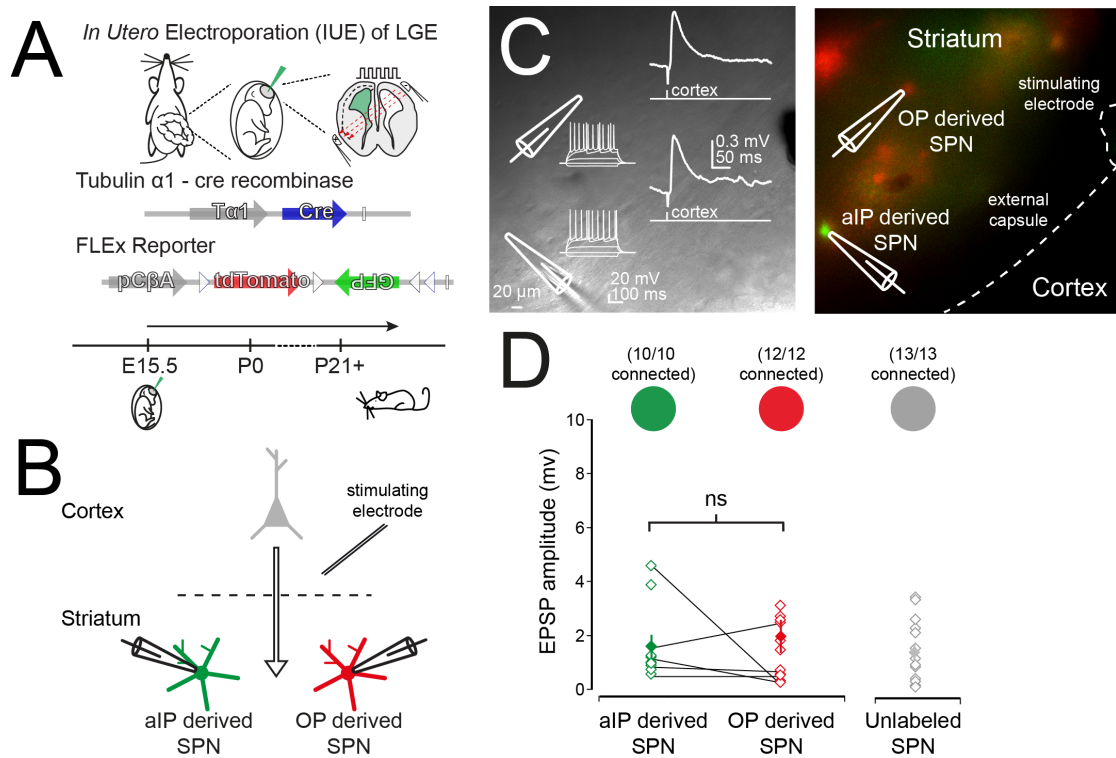

487

488

489 **Figure 4: Both aIP and OP derived SPNs receive cortical input.** (A) IUE of  $T\alpha 1$ -  
 490 Cre and FLEX reporter plasmids was performed at E15.5 to label both aIP and OP  
 491 derived striatal neurons. (B) Diagram of the experimental setup consisting of  
 492 electrical stimulation of cortical afferents while recording from both aIP and OP  
 493 derived neurons in the striatum. All recordings were performed in the presence of  
 494 GABA receptor antagonists. (C) Example Dodt contrast (left) and fluorescence (right)  
 495 image of the experimental setup consisting of a Tungsten electrode placed in the  
 496 external capsule and the simultaneous recording of a  $GFP^+$  aIP derived SPN and a  
 497  $TdTomato^+$  OP derived SPN. (D) Scatter plot of the amplitudes of the excitatory  
 498 postsynaptic responses for aIP derived, OP derived and unlabeled SPNs upon  
 499 stimulation of the cortical afferents. Note that all three classes of SPN receive similar  
 500 amplitude cortically evoked EPSPs.

501

502

503 In postnatal acute brain slices we were now able to deliver short pulses of blue light to  
 504 activate ChR2-mCherry expressing aIP derived neurons (Figure 5C) while  
 505 performing whole-cell voltage-clamp recordings of single or pairs of D1 and D2 SPNs  
 506 at a holding potential of 0 mV to facilitate detection of inhibitory events (Figure 5B  
 507 and D). We recorded from a total of 63 SPNs of which 17 were confirmed D1 SPNs,  
 508 15 were confirmed D2 SPNs and 31 were unclassified. Although we find that the  
 509 incidence of finding a connected SPN is slightly higher for the D1 SPNs than the D2  
 510 SPNs (D1 SPN: 47.1% and D2 SPN: 26.7%) this does not reach statistical

511 significance ( $p=0.517$ ; Fisher's exact test). For the neurons that received inputs from  
 512 the aIP derived neurons we find no significant difference in the amplitude of the light  
 513 evoked inhibitory postsynaptic current (IPSC) as recorded at a holding potential of 0  
 514 mV (D1:  $31.23 \pm 18.11$  pA, D2:  $31.97 \pm 14.69$  pA and unclassified:  $34.15 \pm 15.30$   
 515 pA,  $p=0.797$ , Kruskal Wallis test,  $n = 8, 4$  and  $12$ , **Figure 5E**).

516 In conclusion, these results suggest that both aIP and OP derived SPNs are  
 517 embedded within the neural circuits of the striatum. Indeed, both aIP and OP derived  
 518 striatal SPNs receive excitatory glutamatergic cortical input and aIP derived neurons  
 519 send inhibitory GABAergic outputs to neighbouring D1 and D2 SPNs. Interestingly,  
 520 we find that aIP and OP derived neurons differentially respond to cortical inputs, with  
 521 aIP derived SPNs exhibiting prolonged EPSP kinetics, suggesting that they might  
 522 sample excitatory inputs differently.

523

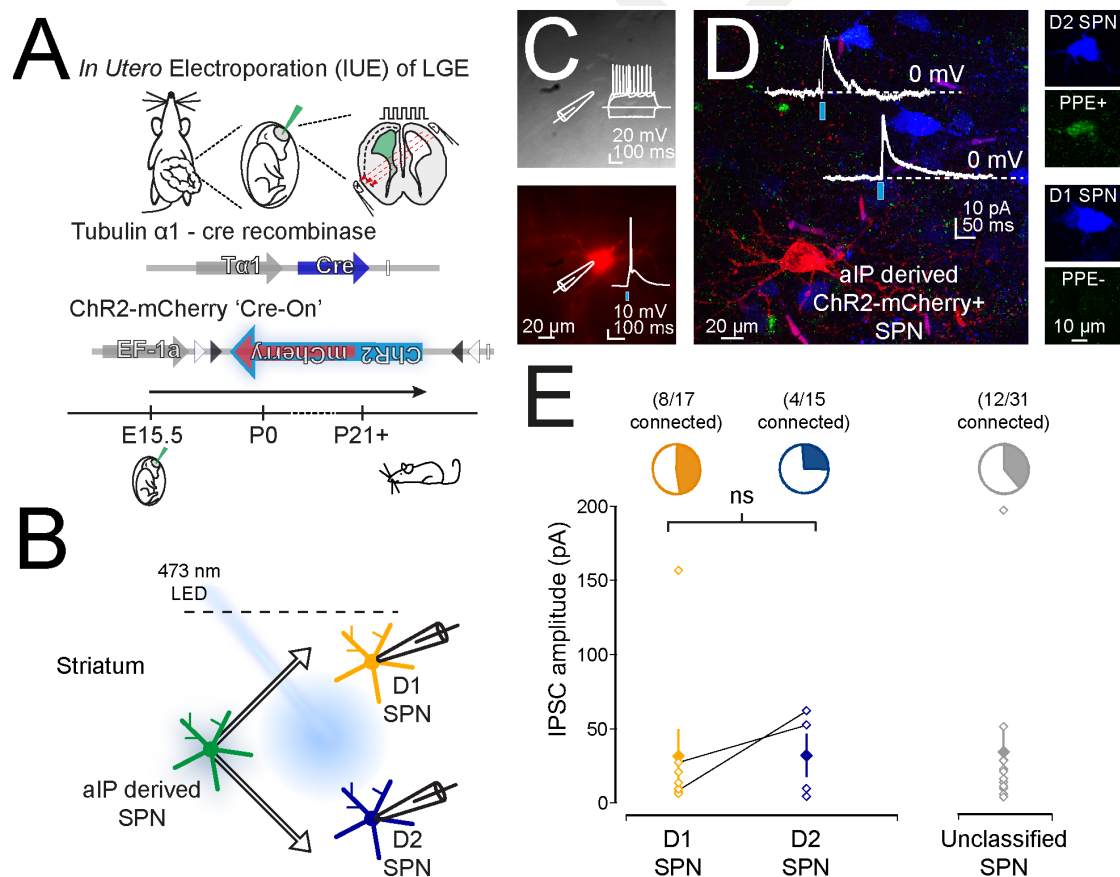

524

525 **Figure 5: aIP derived SPNs connect to both D1 and D2 SPNs** (A) IUE of T $\alpha 1$ -Cre  
 526 and DIO-ChR2-mCherry plasmids allowed for the expression of ChR2-mCherry in  
 527 aIP derived neurons. (B) Diagram of the experimental setup consisting of recordings  
 528 of D1 and D2 SPNs while stimulating aIP derived neurons with a 473 nm wide-field  
 529 LED. All recordings were performed in the presence of glutamate receptor

530 antagonists. (C) Whole-cell patch-clamp recordings of aIP derived ChR2-mCherry  
531 expressing striatal neurons revealed that ~3 ms flashes of light could elicit single  
532 action potentials. Inset top: response of the neuron to hyperpolarising and depolarising  
533 current steps. (D) To investigate striatal inhibitory synaptic output from aIP derived  
534 neurons, simultaneous whole-cell patch-clamp recordings were performed from D1  
535 and D2 SPNs, as determined during recordings in D1 or D2-GFP transgenic mice or  
536 posthoc using immunocytochemistry for PPE. Example image of streptavidin labeled  
537 PPE<sup>+</sup> (upper neuron) and PPE<sup>-</sup> SPN (lower neuron) in close apposition to an aIP  
538 derived-ChR2-mCherry<sup>+</sup> SPN. Traces correspond to light evoked IPSCs. (E) aIP  
539 derived striatal neurons exhibited a slight preference to connect to D1 SPNs (47%)  
540 and optical activation of aIP derived neurons results in similar amplitude IPSCs in all  
541 tested D1, D2 and unclassified SPNs.

542

543

544

## 545 Discussion

546 In this study we examined to what extent neural progenitor pool diversity in the lateral  
547 ganglionic eminence (LGE) contributes to cellular and circuit diversity in the  
548 striatum. Using *in utero* electroporation we are able to label two distinct pools of  
549 dividing neural progenitors in the LGE, which are active during later stages of  
550 neurogenesis. Using differential expression of the tubulin alpha1 (T $\alpha$ 1) promoter we  
551 are able to label a T $\alpha$ 1-expressing pool of neural progenitors we refer to as apical  
552 intermediate progenitors (aIPs) and a non-T $\alpha$ 1-expressing pool we refer to as other  
553 progenitors (OPs). We find that both progenitor types are actively dividing in the  
554 ventricular zone of the LGE around embryonic days (E)15.5-16.5, but exhibit distinct  
555 proliferative behaviours. Whereas aIP progenitors exhibit a short round morphology  
556 during division, lack a basal process and exhibit fast cell cycle kinetics, OP  
557 progenitors tend to retain a basal process and exhibit slower cell cycle kinetics. We  
558 show that both can generate D1-expressing direct pathway spiny projection neurons  
559 (SPNs) as well as D2-expressing indirect pathway SPNs found in both patch and  
560 matrix compartments of the striatum. Whereas aIP and OP derived SPNs were found  
561 intermingled throughout the striatum on average the aIP derived population of SPNs  
562 inhabited more medial aspects of the striatum. Whole-cell patch-clamp recordings and  
563 morphological reconstruction of aIP and OP derived neurons confirmed they were  
564 SPNs with aIP derived SPNs exhibiting a more complex local dendritic tree and an  
565 increased dendritic spine density. Electrical circuit mapping shows that both aIP and  
566 OP derived SPNs sample input from cortical excitatory afferents with aIP derived

567 SPNs exhibiting differential sampling and longer duration responses. Lastly,  
568 optogenetic circuit mapping reveals that aIP derived SPNs send local GABAergic  
569 outputs to both D1 and D2 SPNs. Overall, we show that it is possible to label diverse  
570 pools of neural progenitors in the LGE and their progeny in the striatum. Diversity in  
571 the pool of progenitors can generate diversity in adult striatal neurons, which  
572 manifests itself in different spatial distributions, morphological properties and  
573 sampling of excitatory afferents.

574

#### 575 *Different pools of embryonic neural progenitors in the LGE*

576 The neural progenitors in the LGE of the embryonic mouse brain (Smart, 1976)  
577 generate most of the SPNs of the striatum as well as some of the interneurons of the  
578 olfactory bulb (Olsson *et al.*, 1998; Stenman *et al.*, 2003) with postnatal generation of  
579 striatal neurons also contributing (Stopczynski *et al.*, 2008). Recent studies have  
580 highlighted that the LGE contains as much heterogeneity in neural progenitors (Pilz *et*  
581 *al.*, 2013) as pallial structures (Franco & Muller, 2013). Indeed, in the LGE these  
582 progenitors include radial glial cells, basal radial glial cells, basal progenitors,  
583 subapical progenitors as well as short neural precursors, amongst others (Pilz *et al.*,  
584 2013). It is currently unknown how this heterogeneity at the progenitor level relates to  
585 the cellular and circuit diversity found in the striatum.

586 Several lines of evidence suggest that that the population of progenitors  
587 labeled using the promoter sequence for Ta1 correspond to the short neural precursors  
588 and subapical progenitors recently described in the LGE (Gal *et al.*, 2006; Stancik *et*  
589 *al.*, 2010; Pilz *et al.*, 2013; Ellender *et al.*, 2018). We find that the population of T $\alpha$ 1-  
590 expressing neural progenitors divides at some distance from the ventricular wall but  
591 mostly with the ventricular zone, their cell cycle kinetics are fast and correspond to  
592 about 17 hours, they form a large population of dividing progenitors during later  
593 stages of neurogenesis (E15.5-E16.5) and lastly they lack a basal process during  
594 division. These criteria are consistent to those described for short neural precursors  
595 and the subapical progenitors that are often generated from the short neural precursors  
596 (Pilz *et al.*, 2013). Conversely, even though we find that our population of non-T $\alpha$ 1-  
597 expressing neural progenitors also divides in the ventricular zone, it is more dominant  
598 during early stages of neurogenesis (E12.5/E13.5), has slower cell cycle kinetics  
599 corresponding to about 20 hours (Pilz *et al.*, 2013), and many progenitors retain a  
600 basal process during division. These criteria are consistent with the described

601 morphology of radial glial cells in the LGE (Pilz *et al.*, 2013) and the cortex (Gal *et*  
602 *al.*, 2006; Kriegstein & Alvarez-Buylla, 2009).

603 As the *Ta1*-expressing neural progenitors could be found actively dividing in  
604 the apical aspects of the ventricular zone and had many properties of both short neural  
605 precursors and subapical progenitors (Pilz *et al.*, 2013) we proposed to refer to them  
606 collectively as apical intermediate progenitors (aIPs) and our non-*Ta1*-expressing  
607 neural progenitors as other progenitors (OPs). Therefore, at the point of labeling, our  
608 *in utero* strategy marked a progenitor population enriched for aIPs and a population of  
609 concurrently dividing OPs. Although the method allowed us to distinguish neurons  
610 derived from different progenitor pools, it provides limited information on the lineage  
611 pathways taken by the neurons. Moreover, neural progenitor lineage in the LGE is  
612 complex with extended proliferative divisions and likely both progenitor pools  
613 generate neurons via other progenitors (Pilz *et al.*, 2013).

614

#### 615 *Progenitor derived striatal spiny projection neurons and associated circuits*

616 We find that both aIP and OP neural progenitors generate neurons that can be found  
617 intermingled in the striatum. By varying the embryonic time at which we perform our  
618 IUE we confirm that aIP progenitors are mainly active at later stages of neurogenesis  
619 as we find more aIP derived neurons when we electroporate at E15.5 as compared to  
620 E12.5. Immunohistochemistry for the SPN marker CTIP2 (Arlotta *et al.*, 2008)  
621 reveals that most if not all labeled neurons are SPNs independent of whether IUE was  
622 performed at E12.5 or E15.5. Furthermore, immunohistochemistry for the D2 SPN  
623 marker PPE (Gerfen *et al.*, 1990) reveals that both aIP and OP progenitor pools can  
624 generate D1 and D2 SPNs at both E12.5 and E15.5. These observations are consistent  
625 with the idea that the generation of D1 and D2 SPNs is controlled by other genetic  
626 factors, environmental factors or molecular clocks (Lobo *et al.*, 2006; Franco *et al.*,  
627 2012; Cepko, 2014; Kelly *et al.*, 2018). Indeed, similar observations have been made  
628 in the cortex where both layer 4 stellate neurons and layer 2/3 pyramidal neurons can  
629 be generated from *Ta1*-expressing as well as GLAST-expressing neural progenitors  
630 (Stancik *et al.*, 2010) and indeed a single cortical progenitor can generate clones with  
631 layer-specific characteristics in all layers of cortex (Yu *et al.*, 2009). Whereas the  
632 neural progenitor pool of origin did not seem to affect SPN type or location in patch  
633 or matrix compartments (Pert *et al.*, 1976; Gerfen, 1984; Herkenham *et al.*, 1984;  
634 Gerfen *et al.*, 1985; Jimenez-Castellanos & Graybiel, 1989; Gerfen, 1992; Crittenden

635 & Graybiel, 2011), we find that the earlier time of electroporation resulted in both  
636 pools of progenitors generating a higher proportion of D1 SPNs (Marchand & Lajoie,  
637 1986; van der Kooy & Fishell, 1987; Kelly *et al.*, 2018) as well as generating more  
638 SPNs in patch compartments (Brand & Rakic, 1979; Graybiel & Hickey, 1982; van  
639 der Kooy & Fishell, 1987; Fishell *et al.*, 1990; Newman *et al.*, 2015; Tinterri *et al.*,  
640 2018).

641 Interestingly, we find that the different pools of neural progenitors generate  
642 D1 and D2 SPNs found in different aspects of the striatum, with aIP derived SPNs on  
643 average found in more medial aspects of the striatum. Already at embryonic ages the  
644 aIPs and related young neurons are found at slightly more distal locations relative to  
645 the ventricle, which might suggest that the location of aIP derived neurons in the adult  
646 brain results from such early differences. However, migration in the striatum is  
647 complex in that newly born neurons undergo tangential, radial and other forms of  
648 migration (Halliday & Cepko, 1992; Tan & Breen, 1993; Reid & Walsh, 2002;  
649 Tinterri *et al.*, 2018), suggesting other factors could also contribute to the ultimate  
650 location of striatal neurons (Franco *et al.*, 2012; Kelly *et al.*, 2018). Interestingly,  
651 detailed studies of the inputs to the striatum have revealed that dorsomedial aspects of  
652 the striatum exhibit a high degree of input heterogeneity (Pan *et al.*, 2010; Guo *et al.*,  
653 2015; Hunnicutt *et al.*, 2016) suggesting these different progenitor derived SPNs  
654 might process distinct inputs.

655 Electrophysiological and morphological study of single neurons reveals that  
656 both aIP and OP derived neurons mostly exhibit similar properties consistent with  
657 those of SPNs (Day *et al.*, 2008; Gertler *et al.*, 2008; Krajewski *et al.*, 2018).  
658 Interestingly, we find that aIP derived neurons exhibit a greater local dendritic  
659 complexity and a higher dendritic spine density than OP derived neurons. This  
660 difference might suggest that they differentially sample excitatory inputs. Indeed,  
661 whereas the overall strength of cortical inputs to both aIP and OP derived neurons  
662 seems similar, the aIP derived neurons exhibit comparatively long duration EPSPs.  
663 This might well result from the expression of a different complement of glutamate  
664 receptors postsynaptically.

665 Lastly, it is known that SPNs in the striatum form strong lateral inhibitory  
666 connections with each other with which they can regulate each other's activity  
667 (Taverna *et al.*, 2008; Planert *et al.*, 2010; Chuhma *et al.*, 2011; Krajewski *et al.*, 2018)  
668 and these are not uniform but depend on the type of pre- and postsynaptic SPN

669 (Taverna *et al.*, 2008; Planert *et al.*, 2010; Krajewski *et al.*, 2018). For example, the D2  
670 SPNs form a large number of strong reciprocal connections with each other (Planert *et*  
671 *al.*, 2010; Krajewski *et al.*, 2018). Although our current results suggest that aIP derived  
672 SPNs innervate both local D1 and D2 SPNs, future work will further inform us on  
673 whether and how diverse neural progenitor pools contribute to the establishment of  
674 further fine-scale neural circuits in the striatum.

675 In conclusion, we show that we are able to fluorescently pulse-label two different  
676 pools of neural progenitors in the LGE and their offspring. Using this method we  
677 reveal that heterogeneity in neural progenitor pools in the LGE can contribute to  
678 diversity in the spiny projection neurons and circuits of the striatum. In particular, we  
679 find that aspects of spatial location and morphology of neurons, as well as their  
680 sampling of excitatory afferents seem particularly sensitive to neural progenitor  
681 origin. Future investigations will be informative as to what extent they contribute to  
682 other aspects of striatal diversity (Grillner & Robertson, 2016) and whether neural  
683 progenitor dysregulation plays a role in early onset neurodevelopmental disorders  
684 such as OCD, autism and Tourette's syndrome (Graybiel & Rauch, 2000; Del Campo  
685 *et al.*, 2011; Langen *et al.*, 2011; McNaught & Mink, 2011; Shepherd, 2013; Albin,  
686 2018).

687 **References**

688

689 Albin, R.L. (2018) Tourette syndrome: a disorder of the social decision-making  
690 network. *Brain*, **141**, 332-347.

691

692 Arlotta, P., Molyneaux, B.J., Jabaudon, D., Yoshida, Y. & Macklis, J.D. (2008) Ctip2  
693 controls the differentiation of medium spiny neurons and the  
694 establishment of the cellular architecture of the striatum. *J Neurosci*, **28**,  
695 622-632.

696

697 Bagetta, V., Picconi, B., Marinucci, S., Sgobio, C., Pendolino, V., Ghiglieri, V., Fusco,  
698 F.R., Giampa, C. & Calabresi, P. (2011) Dopamine-dependent long-term  
699 depression is expressed in striatal spiny neurons of both direct and  
700 indirect pathways: implications for Parkinson's disease. *J Neurosci*, **31**,  
701 12513-12522.

702

703 Baumgart, J. & Baumgart, N. (2016) Cortex-, Hippocampus-, Thalamus-,  
704 Hypothalamus-, Lateral Septal Nucleus- and Striatum-specific In Utero  
705 Electroporation in the C57BL/6 Mouse. *J Vis Exp*.

706

707 Brand, S. & Rakic, P. (1979) Genesis of the primate neostriatum: [3H]thymidine  
708 autoradiographic analysis of the time of neuron origin in the rhesus  
709 monkey. *Neuroscience*, **4**, 767-778.

710

711 Cadwell, C.R., Scala, F., Fahey, P.G., Kobak, D., Sinz, F.H., Johnsson, P., Li, S., Cotton,  
712 R.J., Sandberg, R., Berens, P., Jiang, X. & Tolias, A.S. (2019) Cell type  
713 composition and circuit organization of neocortical radial clones. *bioRxiv*,  
714 526681.

715

716 Cepko, C. (2014) Intrinsically different retinal progenitor cells produce specific  
717 types of progeny. *Nature reviews*, **15**, 615-627.

718

719 Chan, C.S., Peterson, J.D., Gertler, T.S., Glajch, K.E., Quintana, R.E., Cui, Q., Sebel,  
720 L.E., Plotkin, J.L., Shen, W., Heiman, M., Heintz, N., Greengard, P. &  
721 Surmeier, D.J. (2012) Strain-specific regulation of striatal phenotype in  
722 *Drd2-eGFP* BAC transgenic mice. *J Neurosci*, **32**, 9124-9132.

723

724 Chuhma, N., Tanaka, K.F., Hen, R. & Rayport, S. (2011) Functional connectome of  
725 the striatal medium spiny neuron. *J Neurosci*, **31**, 1183-1192.

726

727 Crittenden, J.R. & Graybiel, A.M. (2011) Basal Ganglia disorders associated with  
728 imbalances in the striatal striosome and matrix compartments. *Frontiers*  
729 *in neuroanatomy*, **5**, 59.

730

731 Day, M., Wokosin, D., Plotkin, J.L., Tian, X. & Surmeier, D.J. (2008) Differential  
732 excitability and modulation of striatal medium spiny neuron dendrites. *J*  
733 *Neurosci*, **28**, 11603-11614.

734



- 735 Del Campo, N., Chamberlain, S.R., Sahakian, B.J. & Robbins, T.W. (2011) The roles  
736 of dopamine and noradrenaline in the pathophysiology and treatment of  
737 attention-deficit/hyperactivity disorder. *Biological psychiatry*, **69**, e145-  
738 157.  
739
- 740 Ellender, T.J., Avery, S.V., Mahfooz, K., von Klemperer, A., Nixon, S.L., Buchan, M.J.,  
741 van Rheede, J.J., Gatti, A., Waites, C., Newey, S.E. & Akerman, C.J. (2018)  
742 Fine-scale excitatory cortical circuits reflect embryonic progenitor pools.  
743 *bioRxiv*.  
744
- 745 Fishell, G., Rossant, J. & van der Kooy, D. (1990) Neuronal lineages in chimeric  
746 mouse forebrain are segregated between compartments and in the  
747 rostrocaudal and radial planes. *Dev Biol*, **141**, 70-83.  
748
- 749 Flames, N., Pla, R., Gelman, D.M., Rubenstein, J.L., Puelles, L. & Marin, O. (2007)  
750 Delineation of multiple subpallial progenitor domains by the  
751 combinatorial expression of transcriptional codes. *J Neurosci*, **27**, 9682-  
752 9695.  
753
- 754 Franco, S.J., Gil-Sanz, C., Martinez-Garay, I., Espinosa, A., Harkins-Perry, S.R.,  
755 Ramos, C. & Muller, U. (2012) Fate-Restricted Neural Progenitors in the  
756 Mammalian Cerebral Cortex. *Science*, **337**, 746-749.  
757
- 758 Franco, S.J. & Muller, U. (2013) Shaping our minds: stem and progenitor cell  
759 diversity in the mammalian neocortex. *Neuron*, **77**, 19-34.  
760
- 761 Franklin, K.B.J. & Paxinos, G. (2008) *The mouse brain in stereotaxic coordinates*.  
762 Elsevier Academic Press, Amsterdam ; London.  
763
- 764 Gal, J.S., Morozov, Y.M., Ayoub, A.E., Chatterjee, M., Rakic, P. & Haydar, T.F. (2006)  
765 Molecular and morphological heterogeneity of neural precursors in the  
766 mouse neocortical proliferative zones. *J Neurosci*, **26**, 1045-1056.  
767
- 768 Garas, F.N., Kormann, E., Shah, R.S., Vinciati, F., Smith, Y., Magill, P.J. & Sharott, A.  
769 (2018) Structural and molecular heterogeneity of calretinin-expressing  
770 interneurons in the rodent and primate striatum. *The Journal of*  
771 *comparative neurology*, **526**, 877-898.  
772
- 773 Garas, F.N., Shah, R.S., Kormann, E., Doig, N.M., Vinciati, F., Nakamura, K.C., Dorst,  
774 M.C., Smith, Y., Magill, P.J. & Sharott, A. (2016) Secretagogin expression  
775 delineates functionally-specialized populations of striatal parvalbumin-  
776 containing interneurons. *Elife*, **5**.  
777
- 778 Gerfen, C.R. (1984) The neostriatal mosaic: compartmentalization of  
779 corticostriatal input and striatonigral output systems. *Nature*, **311**, 461-  
780 464.  
781
- 782 Gerfen, C.R. (1992) The neostriatal mosaic: multiple levels of compartmental  
783 organization. *Trends in neurosciences*, **15**, 133-139.

- 784  
785 Gerfen, C.R., Baimbridge, K.G. & Miller, J.J. (1985) The neostriatal mosaic:  
786 compartmental distribution of calcium-binding protein and parvalbumin  
787 in the basal ganglia of the rat and monkey. *Proceedings of the National*  
788 *Academy of Sciences of the United States of America*, **82**, 8780-8784.  
789
- 790 Gerfen, C.R., Engber, T.M., Mahan, L.C., Susel, Z., Chase, T.N., Monsma, F.J., Jr. &  
791 Sibley, D.R. (1990) D1 and D2 dopamine receptor-regulated gene  
792 expression of striatonigral and striatopallidal neurons. *Science*, **250**,  
793 1429-1432.  
794
- 795 Gertler, T.S., Chan, C.S. & Surmeier, D.J. (2008) Dichotomous anatomical  
796 properties of adult striatal medium spiny neurons. *J Neurosci*, **28**, 10814-  
797 10824.  
798
- 799 Gong, S., Zheng, C., Doughty, M.L., Losos, K., Didkovsky, N., Schambra, U.B.,  
800 Nowak, N.J., Joyner, A., Leblanc, G., Hatten, M.E. & Heintz, N. (2003) A gene  
801 expression atlas of the central nervous system based on bacterial artificial  
802 chromosomes. *Nature*, **425**, 917-925.  
803
- 804 Graybiel, A.M. & Hickey, T.L. (1982) Chemospecificity of ontogenetic units in the  
805 striatum: demonstration by combining [3H]thymidine neuronography  
806 and histochemical staining. *Proceedings of the National Academy of*  
807 *Sciences of the United States of America*, **79**, 198-202.  
808
- 809 Graybiel, A.M. & Ragsdale, C.W., Jr. (1978) Histochemically distinct  
810 compartments in the striatum of human, monkeys, and cat demonstrated  
811 by acetylthiocholinesterase staining. *Proceedings of the National Academy*  
812 *of Sciences of the United States of America*, **75**, 5723-5726.  
813
- 814 Graybiel, A.M. & Rauch, S.L. (2000) Toward a neurobiology of obsessive-  
815 compulsive disorder. *Neuron*, **28**, 343-347.  
816
- 817 Grillner, S. & Robertson, B. (2016) The Basal Ganglia Over 500 Million Years.  
818 *Current biology : CB*, **26**, R1088-R1100.  
819
- 820 Guillamon-Vivancos, T., Tyler, W.A., Medalla, M., Chang, W.W., Okamoto, M.,  
821 Haydar, T.F. & Luebke, J.I. (2019) Distinct Neocortical Progenitor Lineages  
822 Fine-tune Neuronal Diversity in a Layer-specific Manner. *Cereb Cortex*, **29**,  
823 1121-1138.  
824
- 825 Guo, Q., Wang, D., He, X., Feng, Q., Lin, R., Xu, F., Fu, L. & Luo, M. (2015) Whole-  
826 brain mapping of inputs to projection neurons and cholinergic  
827 interneurons in the dorsal striatum. *PLoS ONE*, **10**, e0123381.  
828
- 829 Halliday, A.L. & Cepko, C.L. (1992) Generation and migration of cells in the  
830 developing striatum. *Neuron*, **9**, 15-26.  
831

- 832 Herkenham, M., Edley, S.M. & Stuart, J. (1984) Cell clusters in the nucleus  
833 accumbens of the rat, and the mosaic relationship of opiate receptors,  
834 acetylcholinesterase and subcortical afferent terminations. *Neuroscience*,  
835 **11**, 561-593.  
836
- 837 Hunnicutt, B.J., Jongbloets, B.C., Birdsong, W.T., Gertz, K.J., Zhong, H. & Mao, T.  
838 (2016) A comprehensive excitatory input map of the striatum reveals  
839 novel functional organization. *Elife*, **5**.  
840
- 841 Jimenez-Castellanos, J. & Graybiel, A.M. (1989) Compartmental origins of striatal  
842 efferent projections in the cat. *Neuroscience*, **32**, 297-321.  
843
- 844 Kelly, S.M., Raudales, R., He, M., Lee, J.H., Kim, Y., Gibb, L.G., Wu, P., Matho, K.,  
845 Osten, P., Graybiel, A.M. & Huang, Z.J. (2018) Radial Glial Lineage  
846 Progression and Differential Intermediate Progenitor Amplification  
847 Underlie Striatal Compartments and Circuit Organization. *Neuron*, **99**,  
848 345-361 e344.  
849
- 850 Kowalczyk, T., Pontious, A., Englund, C., Daza, R.A., Bedogni, F., Hodge, R., Attardo,  
851 A., Bell, C., Huttner, W.B. & Hevner, R.F. (2009) Intermediate neuronal  
852 progenitors (basal progenitors) produce pyramidal-projection neurons  
853 for all layers of cerebral cortex. *Cereb Cortex*, **19**, 2439-2450.  
854
- 855 Krajeski, R.N., Macey-Dare, A., van Heusden, F., Ebrahimjee, F. & Ellender, T.J.  
856 (2018) Early postnatal development of the cellular and circuit properties  
857 of striatal D1 and D2 spiny projection neurons. *bioRxiv*.  
858
- 859 Kramer, P.F., Christensen, C.H., Hazelwood, L.A., Dobi, A., Bock, R., Sibley, D.R.,  
860 Mateo, Y. & Alvarez, V.A. (2011) Dopamine D2 receptor overexpression  
861 alters behavior and physiology in *Drd2*-EGFP mice. *J Neurosci*, **31**, 126-  
862 132.  
863
- 864 Kriegstein, A. & Alvarez-Buylla, A. (2009) The glial nature of embryonic and adult  
865 neural stem cells. *Annual review of neuroscience*, **32**, 149-184.  
866
- 867 Langen, M., Kas, M.J., Staal, W.G., van Engeland, H. & Durston, S. (2011) The  
868 neurobiology of repetitive behavior: of mice. *Neurosci Biobehav Rev*, **35**,  
869 345-355.  
870
- 871 Lee, T., Kaneko, T., Taki, K. & Mizuno, N. (1997) Preprodynorphin-,  
872 preproenkephalin-, and preprotachykinin-expressing neurons in the rat  
873 neostriatum: an analysis by immunocytochemistry and retrograde  
874 tracing. *The Journal of comparative neurology*, **386**, 229-244.  
875
- 876 Lobo, M.K., Karsten, S.L., Gray, M., Geschwind, D.H. & Yang, X.W. (2006) FACS-  
877 array profiling of striatal projection neuron subtypes in juvenile and adult  
878 mouse brains. *Nature neuroscience*, **9**, 443-452.  
879

- 880 Marchand, R. & Lajoie, L. (1986) Histogenesis of the striopallidal system in the  
881 rat. Neurogenesis of its neurons. *Neuroscience*, **17**, 573-590.  
882
- 883 Mason, H.A., Rakowiecki, S.M., Raftopoulou, M., Nery, S., Huang, Y., Gridley, T. &  
884 Fishell, G. (2005) Notch signaling coordinates the patterning of striatal  
885 compartments. *Development*, **132**, 4247-4258.  
886
- 887 McNaught, K.S. & Mink, J.W. (2011) Advances in understanding and treatment of  
888 Tourette syndrome. *Nat Rev Neurol*, **7**, 667-676.  
889
- 890 Nelson, A.B., Hang, G.B., Grueter, B.A., Pascoli, V., Luscher, C., Malenka, R.C. &  
891 Kreitzer, A.C. (2012) A comparison of striatal-dependent behaviors in  
892 wild-type and hemizygous *Drd1a* and *Drd2* BAC transgenic mice. *J*  
893 *Neurosci*, **32**, 9119-9123.  
894
- 895 Newman, H., Liu, F.C. & Graybiel, A.M. (2015) Dynamic ordering of early  
896 generated striatal cells destined to form the striosomal compartment of  
897 the striatum. *The Journal of comparative neurology*, **523**, 943-962.  
898
- 899 Noctor, S.C., Flint, A.C., Weissman, T.A., Dammerman, R.S. & Kriegstein, A.R.  
900 (2001) Neurons derived from radial glial cells establish radial units in  
901 neocortex. *Nature*, **409**, 714-720.  
902
- 903 Noctor, S.C., Martinez-Cerdeno, V., Ivic, L. & Kriegstein, A.R. (2004) Cortical  
904 neurons arise in symmetric and asymmetric division zones and migrate  
905 through specific phases. *Nature neuroscience*, **7**, 136-144.  
906
- 907 Olsson, M., Bjorklund, A. & Campbell, K. (1998) Early specification of striatal  
908 projection neurons and interneuronal subtypes in the lateral and medial  
909 ganglionic eminence. *Neuroscience*, **84**, 867-876.  
910
- 911 Pan, W.X., Mao, T. & Dudman, J.T. (2010) Inputs to the dorsal striatum of the  
912 mouse reflect the parallel circuit architecture of the forebrain. *Frontiers in*  
913 *neuroanatomy*, **4**, 147.  
914
- 915 Pert, C.B., Kuhar, M.J. & Snyder, S.H. (1976) Opiate receptor: autoradiographic  
916 localization in rat brain. *Proceedings of the National Academy of Sciences of*  
917 *the United States of America*, **73**, 3729-3733.  
918
- 919 Pilz, G.A., Shitamukai, A., Reillo, I., Pacary, E., Schwausch, J., Stahl, R., Ninkovic, J.,  
920 Snippert, H.J., Clevers, H., Godinho, L., Guillemot, F., Borrell, V., Matsuzaki,  
921 F. & Gotz, M. (2013) Amplification of progenitors in the mammalian  
922 telencephalon includes a new radial glial cell type. *Nature*  
923 *communications*, **4**, 2125.  
924
- 925 Planert, H., Szydlowski, S.N., Hjorth, J.J., Grillner, S. & Silberberg, G. (2010)  
926 Dynamics of synaptic transmission between fast-spiking interneurons  
927 and striatal projection neurons of the direct and indirect pathways. *J*  
928 *Neurosci*, **30**, 3499-3507.

- 929  
930 Reid, C.B. & Walsh, C.A. (2002) Evidence of common progenitors and patterns of  
931 dispersion in rat striatum and cerebral cortex. *J Neurosci*, **22**, 4002-4014.  
932
- 933 Saunders, A., Johnson, C.A. & Sabatini, B.L. (2012) Novel recombinant adeno-  
934 associated viruses for Cre activated and inactivated transgene expression  
935 in neurons. *Frontiers in neural circuits*, **6**, 47.  
936
- 937 Schambra, U.B. & Schambra, U.B.A.o.p.m.b. (2008) *Prenatal mouse brain atlas*.  
938 Springer, New York ; London.  
939
- 940 Sharott, A., Vinciati, F., Nakamura, K.C. & Magill, P.J. (2017) A Population of  
941 Indirect Pathway Striatal Projection Neurons Is Selectively Entrained to  
942 Parkinsonian Beta Oscillations. *J Neurosci*, **37**, 9977-9998.  
943
- 944 Shepherd, G.M. (2013) Corticostriatal connectivity and its role in disease. *Nature*  
945 *reviews*, **14**, 278-291.  
946
- 947 Shitamukai, A., Konno, D. & Matsuzaki, F. (2011) Oblique radial glial divisions in  
948 the developing mouse neocortex induce self-renewing progenitors  
949 outside the germinal zone that resemble primate outer subventricular  
950 zone progenitors. *J Neurosci*, **31**, 3683-3695.  
951
- 952 Smart, I.H. (1976) A pilot study of cell production by the ganglionic eminences of  
953 the developing mouse brain. *J Anat*, **121**, 71-84.  
954
- 955 Stancik, E.K., Navarro-Quiroga, I., Sellke, R. & Haydar, T.F. (2010) Heterogeneity  
956 in ventricular zone neural precursors contributes to neuronal fate  
957 diversity in the postnatal neocortex. *J Neurosci*, **30**, 7028-7036.  
958
- 959 Stenman, J., Toresson, H. & Campbell, K. (2003) Identification of two distinct  
960 progenitor populations in the lateral ganglionic eminence: implications  
961 for striatal and olfactory bulb neurogenesis. *J Neurosci*, **23**, 167-174.  
962
- 963 Stopczynski, R.E., Poloskey, S.L. & Haber, S.N. (2008) Cell proliferation in the  
964 striatum during postnatal development: preferential distribution in  
965 subregions of the ventral striatum. *Brain structure & function*, **213**, 119-  
966 127.  
967
- 968 Tan, S.S. & Breen, S. (1993) Radial mosaicism and tangential cell dispersion both  
969 contribute to mouse neocortical development. *Nature*, **362**, 638-640.  
970
- 971 Taverna, E., Gotz, M. & Huttner, W.B. (2014) The cell biology of neurogenesis:  
972 toward an understanding of the development and evolution of the  
973 neocortex. *Annu Rev Cell Dev Biol*, **30**, 465-502.  
974
- 975 Taverna, S., Ilijic, E. & Surmeier, D.J. (2008) Recurrent collateral connections of  
976 striatal medium spiny neurons are disrupted in models of Parkinson's  
977 disease. *J Neurosci*, **28**, 5504-5512.

978  
979 Tinterri, A., Menardy, F., Diana, M.A., Lokmane, L., Keita, M., Couplier, F., Lemoine,  
980 S., Mailhes, C., Mathieu, B., Merchan-Sala, P., Campbell, K., Gyory, I.,  
981 Grosschedl, R., Popa, D. & Garel, S. (2018) Active intermixing of indirect  
982 and direct neurons builds the striatal mosaic. *Nature communications*, **9**,  
983 4725.  
984  
985 Tyler, W.A., Medalla, M., Guillamon-Vivancos, T., Luebke, J.I. & Haydar, T.F. (2015)  
986 Neural precursor lineages specify distinct neocortical pyramidal neuron  
987 types. *J Neurosci*, **35**, 6142-6152.  
988  
989 van der Kooy, D. & Fishell, G. (1987) Neuronal birthdate underlies the  
990 development of striatal compartments. *Brain research*, **401**, 155-161.  
991  
992 Wamsley, B. & Fishell, G. (2017) Genetic and activity-dependent mechanisms  
993 underlying interneuron diversity. *Nature reviews*, **18**, 299-309.  
994  
995 Wang, X., Tsai, J.W., LaMonica, B. & Kriegstein, A.R. (2011) A new subtype of  
996 progenitor cell in the mouse embryonic neocortex. *Nature neuroscience*,  
997 **14**, 555-561.  
998  
999 Wonders, C.P. & Anderson, S.A. (2006) The origin and specification of cortical  
1000 interneurons. *Nature reviews*, **7**, 687-696.  
1001  
1002 Xu, Z., Liang, Q., Song, X., Zhang, Z., Lindtner, S., Li, Z., Wen, Y., Liu, G., Guo, T., Qi,  
1003 D., Wang, M., Wang, C., Li, H., You, Y., Wang, X., Chen, B., Feng, H.,  
1004 Rubenstein, J.L. & Yang, Z. (2018) SP8 and SP9 coordinately promote D2-  
1005 type medium spiny neuron production by activating Six3 expression.  
1006 *Development*, **145**.  
1007  
1008 Yu, Y.C., Bultje, R.S., Wang, X. & Shi, S.H. (2009) Specific synapses develop  
1009 preferentially among sister excitatory neurons in the neocortex. *Nature*,  
1010 **458**, 501-504.  
1011  
1012 Yu, Y.C., He, S., Chen, S., Fu, Y., Brown, K.N., Yao, X.H., Ma, J., Gao, K.P., Sosinsky,  
1013 G.E., Huang, K. & Shi, S.H. (2012) Preferential electrical coupling regulates  
1014 neocortical lineage-dependent microcircuit assembly. *Nature*, **486**, 113-  
1015 117.  
1016  
1017  
1018

## 1019 **Methods & Materials**

1020

### 1021 Animals

1022 All experiments were carried out on C57/BL6 wildtype and heterozygous D1-GFP or  
1023 D2-GFP mice of both sexes with *ad libitum* access to food and water. The D1-GFP or  
1024 D2-GFP BAC transgenic mice report subtypes of the dopamine receptor, either D1 or  
1025 D2, by the presence of GFP (Mutant Mouse Regional Resource Centers, MMRRC).  
1026 Details of the mice and the methods of BAC mice production have been published  
1027 (Gong *et al.*, 2003) and can be found on the GENSAT website [GENSAT (2009) The  
1028 Gene Expression Nervous System Atlas (GENSAT) Project. In: NINDS, Contracts  
1029 N01NS02331 and HHSN271200723701C, The Rockefeller University (New York),  
1030 <http://www.gensat.org/index.html>]. The BAC transgenic mice were backcrossed to a  
1031 C57/BL6 background over 20+ generations prior to use and kept as a heterozygous  
1032 mouse line to avoid published issues using these transgenic lines (Bagetta *et al.*, 2011;  
1033 Kramer *et al.*, 2011; Chan *et al.*, 2012; Nelson *et al.*, 2012). All mice were bred, IVC  
1034 housed in a temperature controlled animal facility (normal 12:12 h light/dark cycles)  
1035 and used in accordance with the UK Animals (Scientific Procedures) Act (1986).  
1036 Females were checked for plugs daily; the day of the plug was considered embryonic  
1037 day (E)0.5 and injection of plasmids and *in utero* electroporation (IUE) was  
1038 performed at E12.5 - E16.5.

1039

### 1040 Electroporation

1041 *In utero* electroporation (IUE) was performed using standard procedures. In short,  
1042 pregnant females were anaesthetized using isoflurane and their uterine horns were  
1043 exposed by midline laparotomy. A mixture of plasmid DNA (~1.5 µg/µl) and 0.03%  
1044 fast green dye was injected intraventricularly using pulled micropipettes through the  
1045 uterine wall and amniotic sac. Plasmid DNA included: (i) 'Tα1-Cre', in which the  
1046 gene for Cre recombinase is under the control of a portion of the Tα1 promoter  
1047 (Stancik *et al.*, 2010); (ii) 'CβA-FLEx' which uses the chicken β-actin promoter to  
1048 control a flexible excision (FLEx) cassette in which Cre recombination switches  
1049 expression from TdTomato fluorescent protein to enhanced green fluorescent protein  
1050 (Franco *et al.*, 2012); and (iii) 'DIO-ChR2-mCherry' (pAAV-EF1a-doublefloxed-  
1051 hChR2(H134R)-mCherry-WPRE-HGHpA; Addgene #20297), in which Cre  
1052 recombination turns on the expression of channelrhodopsin-2 (ChR2) under the  
1053 control of the human elongation factor-1a promoter (Saunders *et al.*, 2012). Total  
1054 volume injected per pup was ~1 µl. Tα1-Cre and CβA-FLEx constructs (and other  
1055 combinations of constructs) were injected as a 1:1 ratio of plasmid DNA (each 3  
1056 µg/µl, so final concentration of both constructs was 1.5 µg/µl). The cathode of the  
1057 Tweezertrode (Genetronics) was placed just above the eye outside the uterine muscle  
1058 and the anode was placed slightly lower at the contralateral cheek region (Baumgart  
1059 & Baumgart, 2016). Five pulses (50 ms duration separated by 200 - 950 ms) at 42-  
1060 60V with a BTX ECM 830 pulse generator (Genetronics). Typically around 80% of  
1061 the pups underwent electroporation. Afterwards the uterine horns were placed back  
1062 inside the abdomen, the cavity filled with warm physiological saline and the

1063 abdominal muscle and skin incisions were closed with vicryl and prolene sutures,  
1064 respectively. Dams were placed back in a clean cage and monitored closely until the  
1065 birth of the pups.

1066

#### 1067 Slice preparation and recording conditions

1068 Acute striatal slices were made from postnatal animals at 3-5 weeks of age. Animals  
1069 were anaesthetized with isoflurane and then decapitated. Coronal 350-400  $\mu\text{m}$  slices  
1070 were cut using a vibrating microtome (Microm HM650V). Slices were prepared in  
1071 artificial cerebrospinal fluid (aCSF) containing (in mM): 65 Sucrose, 85 NaCl, 2.5  
1072 KCl, 1.25  $\text{NaH}_2\text{PO}_4$ , 7  $\text{MgCl}_2$ , 0.5  $\text{CaCl}_2$ , 25  $\text{NaHCO}_3$  and 10 glucose, pH 7.2-7.4,  
1073 bubbled with carbogen gas (95%  $\text{O}_2$  / 5%  $\text{CO}_2$ ). Slices were immediately transferred  
1074 to a storage chamber containing aCSF (in mM): 130 NaCl, 3.5 KCl, 1.2  $\text{NaH}_2\text{PO}_4$ , 2  
1075  $\text{MgCl}_2$ , 2  $\text{CaCl}_2$ , 24  $\text{NaHCO}_3$  and 10 glucose, pH 7.2 - 7.4, at 32 °C and bubbled with  
1076 carbogen gas until used for recording. Striatal slices were transferred to a recording  
1077 chamber and continuously superfused with aCSF bubbled with carbogen gas with the  
1078 same composition as the storage solution (32 °C and perfusion speed of 2 ml/min).  
1079 Whole-cell recordings were performed using glass pipettes ( $\sim 6\text{M}\Omega$ ), pulled from  
1080 standard wall borosilicate glass capillaries and containing for whole-cell current-  
1081 clamp (in mM): 110 potassium gluconate, 40 HEPES, 2 ATP-Mg, 0.3 Na-GTP, 4  
1082 NaCl and 4 mg/ml biocytin (pH 7.2-7.3; osmolarity, 290-300 mosmol/l) and for  
1083 whole-cell voltage-clamp (in mM): 120 cesium gluconate, 40 HEPES, 4 NaCl, 2  
1084 ATP-Mg, 0.3 Na-GTP, 0.2 QX-314 and 4 mg/ml biocytin (pH 7.2-7.3; osmolarity,  
1085 290-300 mosmol/L). Recordings were made using Multiclamp 700B amplifiers and  
1086 filtered at 4kHz and acquired using an InstruTECH ITC-18 analog/digital board and  
1087 WinWCP software (University of Strathclyde, RRID:SCR\_014713) at 10 kHz.

1088

#### 1089 Stimulation and recording protocols

1090 Hyperpolarizing and depolarizing current steps were used to assess the intrinsic  
1091 properties of the recorded SPNs including input resistance and spike threshold (using  
1092 small incremental current steps) as well as the properties of action potentials  
1093 (amplitude, frequency and duration). Properties were assessed immediately on break-  
1094 in. Activation of excitatory cortical afferents was performed via a bipolar stimulating  
1095 electrode (FHC Inc., USA) placed in the external capsule, and in the presence of  
1096 blockers of inhibitory GABAergic transmission including the  $\text{GABA}_A$ -receptor  
1097 antagonist SR95531 (1  $\mu\text{M}$ ) and the  $\text{GABA}_B$ -receptor antagonist CGP52432 (2  $\mu\text{M}$ ).  
1098 Afferents were activated every 5s with up to 20 repetitions and excitatory  
1099 postsynaptic potentials (EPSPs) were recorded from the patched SPNs.  
1100 Photoactivation of ChR2 was achieved using widefield 2-3 ms duration light pulses of  
1101  $\sim 1$  mW via a TTL triggered CoolLED pE-300 system (CoolLED, Andover, UK)

1102

#### 1103 Analysis of recordings

1104 Data were analyzed offline using custom written programs in Igor Pro (Wavemetrics,  
1105 RRID:SCR\_000325). The input resistance was calculated from the observed  
1106 membrane potential change after hyperpolarizing the membrane potential with a set



1107 current injection. The spike threshold was the membrane voltage at which the SPN  
1108 generated an action potential. The action potential amplitude was taken from the peak  
1109 amplitude of the individual action potentials relative to the average steady-state  
1110 membrane depolarization during positive current injection. Action potential duration  
1111 was taken as the duration between the upward and downward stroke of the action  
1112 potential at 25% of the peak amplitude. Evoked EPSPs and IPSCs were defined as  
1113 upward or downward deflections of more than 2 standard deviations (SD) on average  
1114 synaptic responses generated after filtering and averaging original traces (0.1 Hz high-  
1115 pass filter and 500 Hz low-pass filter) and used for analysis of synaptic properties.  
1116 Synaptic properties include measurements of peak amplitude, duration (measured  
1117 from the start of the upward/downward stroke of the event until its return to the pre-  
1118 event baseline), rise time (time between 20% and 80% of the peak amplitude) and  
1119 decay time (measured as the time from peak amplitude until the event returned to 50%  
1120 of peak amplitude).

1121

#### 1122 Histological analyses

1123 Following whole-cell patch-clamp recordings the brain slices were fixed in 4%  
1124 paraformaldehyde in 0.1 M phosphate buffer (PB; pH 7.4). Biocytin-filled neurons  
1125 were visualized by incubating sections in 1:10,000 streptavidin AlexaFluor405-  
1126 conjugated antibodies (ThermoFisher Scientific, Cat#:S32351). Visualized neurons  
1127 were labeled for chicken ovalbumin upstream promoter transcription-factor  
1128 interacting protein-2 (CTIP2, 1:1000, rat, Abcam, Cat#:ab14865,  
1129 RRID:AB\_2064130) and pre-proenkephalin (PPE, 1:1000, rabbit, LifeSpan  
1130 Biosciences, Cat#:LS-C23084, RRID:AB\_902714) in PBS containing 0.3% Triton X-  
1131 100 (PBS-Tx) overnight at 4°C followed by incubation with goat-anti-rat  
1132 AlexaFluor647 (1:500; ThermoFisher Scientific, CAT#:A-21247, RRID:AB\_141778)  
1133 and goat-anti-rabbit AlexaFluor555 (1:500; ThermoFisher Scientific, CAT#:A-21429,  
1134 RRID:AB\_2535850) or goat-anti-rabbit AlexaFluor488 (1:500; ThermoFisher  
1135 Scientific, CAT#:A32731, RRID:AB\_2633280) secondary antibodies in 0.3% PBS-  
1136 Tx for 2 h at RT for D1 or D2 SPN classification. Occasionally the endogenous  
1137 fluorescence would be boosted with antibodies against GFP (1:1000, chicken, Aves  
1138 Labs, CAT# GFP-1020, RRID:AB\_10000240) or TdTomato (1:1000; rat; anti-RFP;  
1139 Chromotek, CAT# 5f8-100, RRID:AB\_2336064) or slices were co-stained with the  
1140 nuclear marker 4',6-diamidino-2-phenylindole (DAPI) in PBS (1:100,000) to facilitate  
1141 the delineation of brain structures. CTIP2 is expressed by SPNs and not interneurons  
1142 (Arlotta *et al.*, 2008) and PPE reliably labels indirect pathway D2 SPNs (Lee *et al.*,  
1143 1997; Sharott *et al.*, 2017). PPE antibody staining was facilitated through antigen  
1144 retrieval by heating sections at 80° C in 10 mM sodium citrate (pH 6.0) for  
1145 approximately 30-60 min prior to incubation with PPE primary antibody. After  
1146 classification of SPNs the slices were washed 3 times in PBS and processed for DAB  
1147 immunohistochemistry using standard procedures.

1148 Whole-brain fixation of embryonic and adult brains was performed by rapid  
1149 decapitation of the head and submersion in oxygenated sucrose cutting solution before

1150 submersion in 4% paraformaldehyde in 0.1 M phosphate buffer (PB; pH 7.4). The  
1151 brains were fixed for 24 – 48 hours, after which they were washed in PBS. Whole-  
1152 brain tissue was directly, or in the case of embryonic tissue after embedding in 5%  
1153 agar, sectioned at 50  $\mu\text{m}$  on a vibrating microtome (VT1000S; Leica Microsystems).  
1154 All sections were pre-incubated in 10-20% normal donkey serum (NDS; Vector  
1155 Laboratories) or normal goat serum (NGS; Vector Laboratories) in PBS for more than  
1156 1h at RT. GFP<sup>+</sup> (T $\alpha$ 1<sup>+</sup>) and TdTomato<sup>+</sup> (T $\alpha$ 1<sup>-</sup>) progenitors and neurons were often  
1157 visualized without antibody-mediated augmentation of fluorescence but in rare cases  
1158 the endogenous fluorescence was boosted with antibodies against GFP (1:1000,  
1159 chicken, Aves Labs, CAT#:GFP-1020, RRID:AB\_10000240) or TdTomato (1:1000;  
1160 rat; anti-RFP; Chromotek, CAT#:5f8-100, RRID:AB\_2336064) and Goat-Anti-  
1161 chicken AlexaFluor488 (1:500; Life Technologies, CAT#:A11039,  
1162 RRID:AB\_142924) and Goat-Anti-rat AlexaFluor555 (1:500; Life Technologies,  
1163 CAT#:A-21429, RRID:AB\_2535850). In embryonic tissue antibody labeling was  
1164 used to label pH3 in neural progenitors (1:500; rabbit; Millipore, CAT#:06-570,  
1165 RRID:AB\_310177). Adult tissue was either co-stained in 1:100,000 DAPI in PBS to  
1166 facilitate the delineation of brain structures or was labeled for MOR (1:3000, goat,  
1167 ImmunoStar CAT#:24216, RRID:AB\_572251) or CTIP2 (1:1000, rat: Abcam  
1168 Cat#:ab14865, RRID:AB\_2064130) and PPE (1:1000, rabbit, LifeSpan Biosciences  
1169 Cat#:LS-C23084, RRID:AB\_902714). PPE staining was facilitated through antigen  
1170 retrieval by heating sections at 80° C in 10 mM sodium citrate (pH 6.0) for  
1171 approximately 30 min prior to incubation with 1:1000 rabbit anti-PPE in PBS-Tx and  
1172 1% NDS overnight at 4°C, after which the reaction was revealed by incubating with  
1173 1:500 donkey-anti-rabbit AlexaFluor647 (1:500, Life Technologies CAT#:A31573,  
1174 RRID:AB\_2536183) in PBS-Tx for 2 h at RT.

1175

#### 1176 Stereology and analysis of tissue

1177 Fluorescence images were captured with a LSM 710 confocal microscope using ZEN  
1178 software (Zeiss, RRID:SCR\_013672) or Leica DM5000B epifluorescence microscope  
1179 using Openlab software (PerkinElmer, RRID:SCR\_012158). Counting of labeled  
1180 GFP<sup>+</sup> and TdTomato<sup>+</sup> progenitors and young neurons and assessing their location  
1181 within the embryonic brain was performed using ImageJ (RRID:SCR\_003070) on z-  
1182 stacks of ~40  $\mu\text{m}$  thickness. In embryonic tissue occasionally yellow cells could be  
1183 seen which were counted as GFP<sup>+</sup> and were assumed to have undergone  
1184 recombination relatively recently. Positive cells had a fluorescence signal that was at  
1185 least twice the background fluorescence (measured from randomly selected regions of  
1186 the tissue). X- and y-coordinates labeled cells were used to calculate the distance from  
1187 the ventricle and spread. Counting of progenitor cell basal processes was performed in  
1188 z-stack projections of confocal stacks of ~40  $\mu\text{m}$  thickness. All clearly delineated  
1189 processes above the SVZ and extending towards the pial surface were counted. M-  
1190 phase reentry after IUE for aIP and OP was estimated from co-labeling of cells with  
1191 the mitotic marker pH3 in tissue fixed with varying time-delays after IUE of T $\alpha$ 1-Cre  
1192 and C $\beta$ A-FLEx plasmids (Stancik *et al.*, 2010). Localizing GFP<sup>+</sup> and TdTomato<sup>+</sup>

1193 progenitors and young neurons in various sub regions of the LGE was performed  
1194 using a combination of anatomical landmarks (Schambra & Schambra, 2008) and  
1195 previous delineations (Flames *et al.*, 2007). Olfactory bulb analysis was performed  
1196 using a total of 5 brains and all GFP or TdTomato positive cells were counted in z-  
1197 stacks of ~40  $\mu\text{m}$  thickness.

1198 Progenitor derived neuron counting and analysis was performed similar to  
1199 (Garas *et al.*, 2016; Garas *et al.*, 2018). In brief, a version of design-based stereology,  
1200 the ‘modified optical fractionator’ was used to generate unbiased cell counts and map  
1201 distributions of striatal neurons in rostral, middle and caudal sections (Franklin &  
1202 Paxinos, 2008). Once the chosen striatal coronal planes were identified and the  
1203 immunofluorescence protocol carried out, the dorsal striatum was delineated using a  
1204 Zeiss Imager M2 epifluorescence microscope (Carl Zeiss, AxioImager.M2) equipped  
1205 with a 20X (Numerical Aperture = 0.8) objective and StereoInvestigator v9.0 software  
1206 (MBF Biosciences). Imaging was subsequently performed by capturing a series of  
1207 completely tessellated, z-stacked images (each 1  $\mu\text{m}$  thick) at depths from 2 to 12  $\mu\text{m}$   
1208 from the upper surface of each section at the level of the striatum (thereby defining a  
1209 10  $\mu\text{m}$ -thick optical disector). As counts were performed across the entirety of the  
1210 dorsal striatum within a given rostro-caudal plane, the grid size and counting frame  
1211 were set to the same size of 420 x 320  $\mu\text{m}$ . To minimize confounds arising from  
1212 surface irregularities, neuropil within a 2  $\mu\text{m}$  ‘guard zone’ at the upper surface was  
1213 not imaged. A neuron was counted if the top of its nucleus came into focus within the  
1214 disector. If the nucleus was already in focus at the top of the 10  $\mu\text{m}$  -thick optical  
1215 disector the neuron was excluded. Normalised positions were calculated as described  
1216 in (Garas *et al.*, 2016; Garas *et al.*, 2018). Mediolateral and dorsoventral bias within  
1217 each individual section was assessed by computing a Wilcoxon Sign rank test on the  
1218 positions of all neurons across or within groups to test whether they significantly  
1219 differed from zero (minimum 8 neurons for a given section). Mediolateral and  
1220 dorsoventral positions of red and green neurons across animals were compared by  
1221 computing a Wilcoxon sign rank test on the normalised position in each direction for  
1222 each section, when there were a minimum of 8 neurons of each type in a single  
1223 section (n = 20 sections).

1224 DAB-immunoreactive neurons were visualized on a brightfield microscope  
1225 and were reconstructed and analyzed using NeuroLucida and Neuroexplorer software  
1226 (MBF Bioscience, RRID:SCR\_001775). Only labeled neurons that exhibited a full  
1227 dendritic arbor were included for analysis e.g. cells with clear truncations were not  
1228 included in the dataset. Scholl analysis and polarity analysis was performed using  
1229 standard procedures. In brief, both Scholl and polarity plots were generated for  
1230 individual SPNs by calculating the total dendritic length located within 10° segments  
1231 with increasing distance from the soma. The dendritic lengths were subsequently  
1232 normalised for an individual SPN and averaging the normalised plots of individual  
1233 neurons generated final plots.

1234

1235 Statistics

1236 All data are presented as means  $\pm$  SEM. The 'n' refers to the number of brains (Figure  
1237 1 and 2) or neurons (Figure 3 – 5) tested. Statistical tests were all two-tailed and  
1238 performed using SPSS 17.0 (IBM SPSS statistics, RRID:SCR\_002865) or GraphPad  
1239 Prism version 5.0 (GraphPad software, RRID:SCR\_002798). Synaptic connectivity  
1240 ratios were compared with Fisher's Exact test. Continuous data were assessed for  
1241 normality and appropriate parametric (ANOVA, paired t-test and unpaired t-test) or  
1242 non-parametric (Mann-Whitney U) statistical tests were applied (\*  $p < 0.05$ , \*\*  $p < 0.01$ ,  
1243 \*\*\*  $p < 0.001$ ).  
1244  
1245

DRAFT

1246 **Tables**

1247

1248

1249

1250

1251

1252

1253

1254

1255

1256

1257

**Table 1: Intrinsic membrane properties of progenitor derived SPNs**

|                                 | aIP derived   | OP derived    | p-value | Unlabeled     |
|---------------------------------|---------------|---------------|---------|---------------|
| Resting membrane potential (mV) | -80.25 ± 1.21 | -79.10 ± 0.64 | 0.28    | -79.35 ± 0.69 |
| Input resistance (MΩ)           | 88.12 ± 6.77  | 80.96 ± 4.72  | 0.36    | 80.27 ± 7.53  |
| Spike threshold (mV)            | -40.93 ± 1.66 | -39.98 ± 0.92 | 0.32    | -39.47 ± 1.22 |
| Spike rate (500pA) (Hz)         | 34.17 ± 2.09  | 30.80 ± 1.95  | 0.15    | 31.46 ± 2.42  |
| Spike rate (400pA) (Hz)         | 28.58 ± 1.75  | 28.25 ± 1.76  | 0.91    | 27.57 ± 2.14  |
| Spike rate (300pA) (Hz)         | 22.31 ± 2.71  | 23.23 ± 1.68  | 0.77    | 22.50 ± 2.13  |
| Spike rate (200pA) (Hz)         | 14.75 ± 2.19  | 19.70 ± 2.20  | 0.20    | 17.78 ± 2.65  |
| Spike rate (100pA) (Hz)         | 4.17 ± 0.83   | 13.00 ± 2.29  | 0.06    | 9.17 ± 0.83   |
| First ISI (ms)                  | 26.02 ± 2.99  | 26.92 ± 5.04  | 0.88    | 31.46 ± 4.97  |
| Second ISI (ms)                 | 28.08 ± 2.22  | 27.64 ± 1.88  | 0.89    | 32.92 ± 3.89  |
| Third ISI (ms)                  | 32.74 ± 2.63  | 32.85 ± 2.26  | 0.98    | 33.50 ± 2.90  |
| Fourth ISI (ms)                 | 34.09 ± 2.56  | 35.17 ± 2.36  | 0.78    | 34.98 ± 2.61  |
| First spike amplitude (mV)      | 87.11 ± 3.81  | 85.76 ± 2.76  | 0.78    | 94.13 ± 2.53  |
| Second spike amplitude (mV)     | 73.13 ± 4.79  | 65.54 ± 3.42  | 0.22    | 81.33 ± 3.34  |
| First spike duration (ms)       | 2.17 ± 0.21   | 1.90 ± 0.09   | 0.18    | 1.69 ± 0.13   |
| Second spike duration (ms)      | 2.68 ± 0.28   | 2.54 ± 0.18   | 0.67    | 2.09 ± 0.17   |

**Data are given as mean ± SEM, statistical comparisons by t-test or Mann-Whitney U test**

1258

1259

1260

1261

1262

1263

1264

1265

1266

1267

1268

1269

1270

1271

1272

1273

1274  
1275  
1276  
1277  
1278  
1279  
1280  
1281  
1282  
1283

**Table 2: Cortical synaptic response properties**

|                 | aIP derived   | OP derived    | p-value | Unlabeled      |
|-----------------|---------------|---------------|---------|----------------|
| Amplitude (pA)  | 1.70 ± 0.44   | 2.08 ± 0.62   | 0.77    | 1.50 ± 0.33    |
| Duration (ms)   | 143.9 ± 14.48 | 99.30 ± 10.47 | 0.03    | 112.81 ± 11.76 |
| Rise time (ms)  | 5.73 ± 0.42   | 5.87 ± 0.95   | 0.83    | 4.47 ± 0.29    |
| Decay time (ms) | 66.20 ± 6.98  | 44.63 ± 5.32  | 0.03    | 55.86 ± 5.90   |

**Data are given as mean ± SEM, statistical comparisons by Mann-Whitney test.**

1284 **Supplementary Figures**

1285  
1286  
1287  
1288  
1289  
1290  
1291  
1292  
1293  
1294  
1295  
1296  
1297  
1298

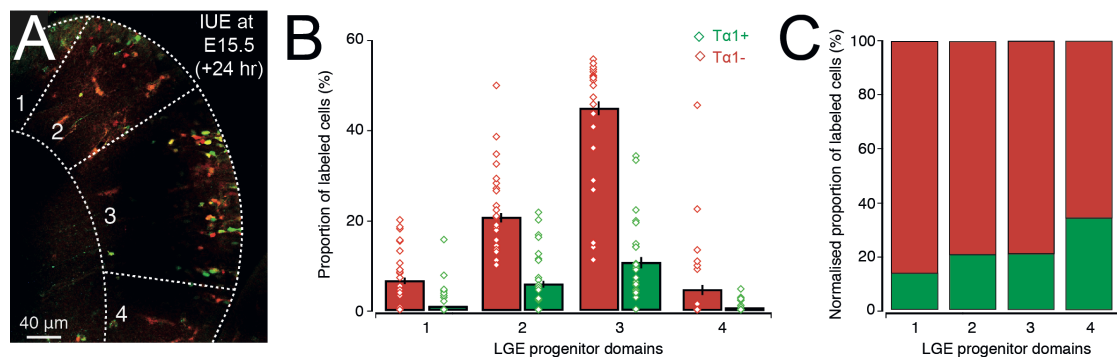

1299  
1300  
1301  
1302  
1303  
1304  
1305  
1306  
1307  
1308  
1309  
1310  
1311  
1312  
1313  
1314  
1315  
1316  
1317  
1318  
1319

**Supplementary Figure 1: IUE labeled cells can be found in all domains of the LGE.** (A) Example coronal section of an embryonic mouse brain 24 hours after IUE at E15.5 with  $Ta1$ -cre and FLEX plasmids. Note that  $GFP^+$  and  $TdTomato^+$  labeled cells can be seen in all progenitor domains of the LGE. (B) Average barplot of the proportion of  $Ta1^+/GFP^+$  and  $Ta1^-/TdTomato^+$  labeled cells in the different progenitor domains of the LGE. Note that our labeling strategy predominantly targets LGE3 (all labeled neurons: LGE1: 7.6%, LGE2: 32.0%, LGE3: 59.0% and LGE4: 1.3%) and that each progenitor domain of the LGE contains both  $Ta1^+/GFP^+$  and  $Ta1^-/TdTomato^+$  progenitors. (C) The relative proportion of  $Ta1^+/GFP^+$  and  $Ta1^-/TdTomato^+$  labeled cells appears relatively constant between the different domains of the LGE.

1320  
1321  
1322  
1323  
1324  
1325  
1326  
1327  
1328  
1329  
1330  
1331  
1332  
1333  
1334  
1335  
1336  
1337  
1338  
1339  
1340  
1341  
1342  
1343  
1344  
1345  
1346  
1347  
1348  
1349  
1350  
1351  
1352  
1353  
1354  
1355  
1356  
1357  
1358  
1359  
1360  
1361  
1362  
1363  
1364  
1365  
1366  
1367

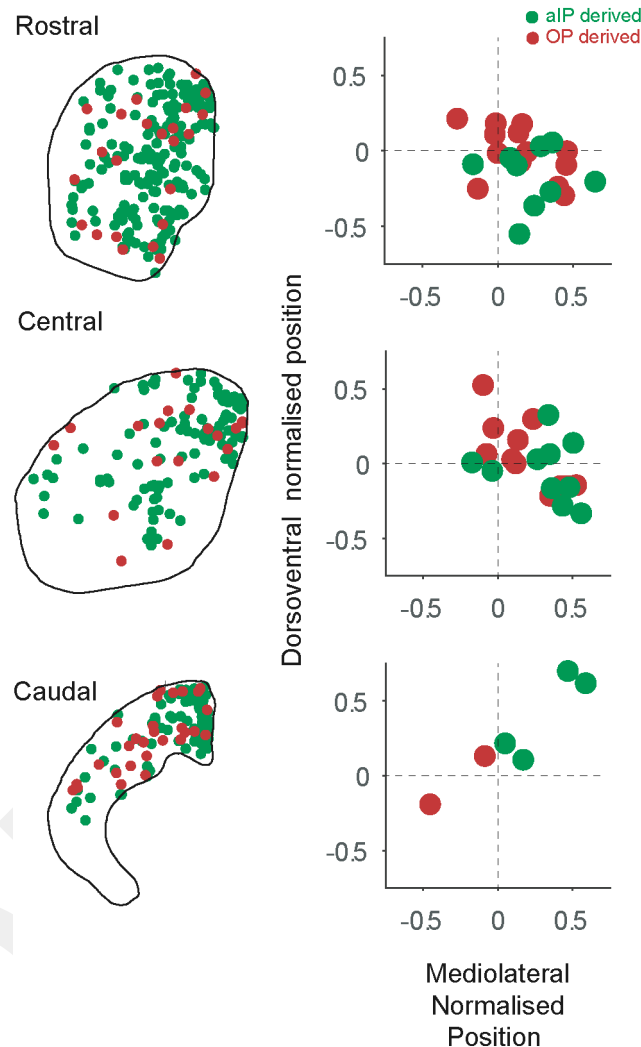

**Supplementary Figure 2: Labeled aIP and OP derived striatal neurons in rostral, central and caudal striatum.** Left column, positions of aIP and OP derived neurons in rostral, central and caudal sections of a single animal. Right column, normalised positions of aIP and OP derived neurons in each plane (rostral n = 13, central n = 11, caudal n = 4 mice).



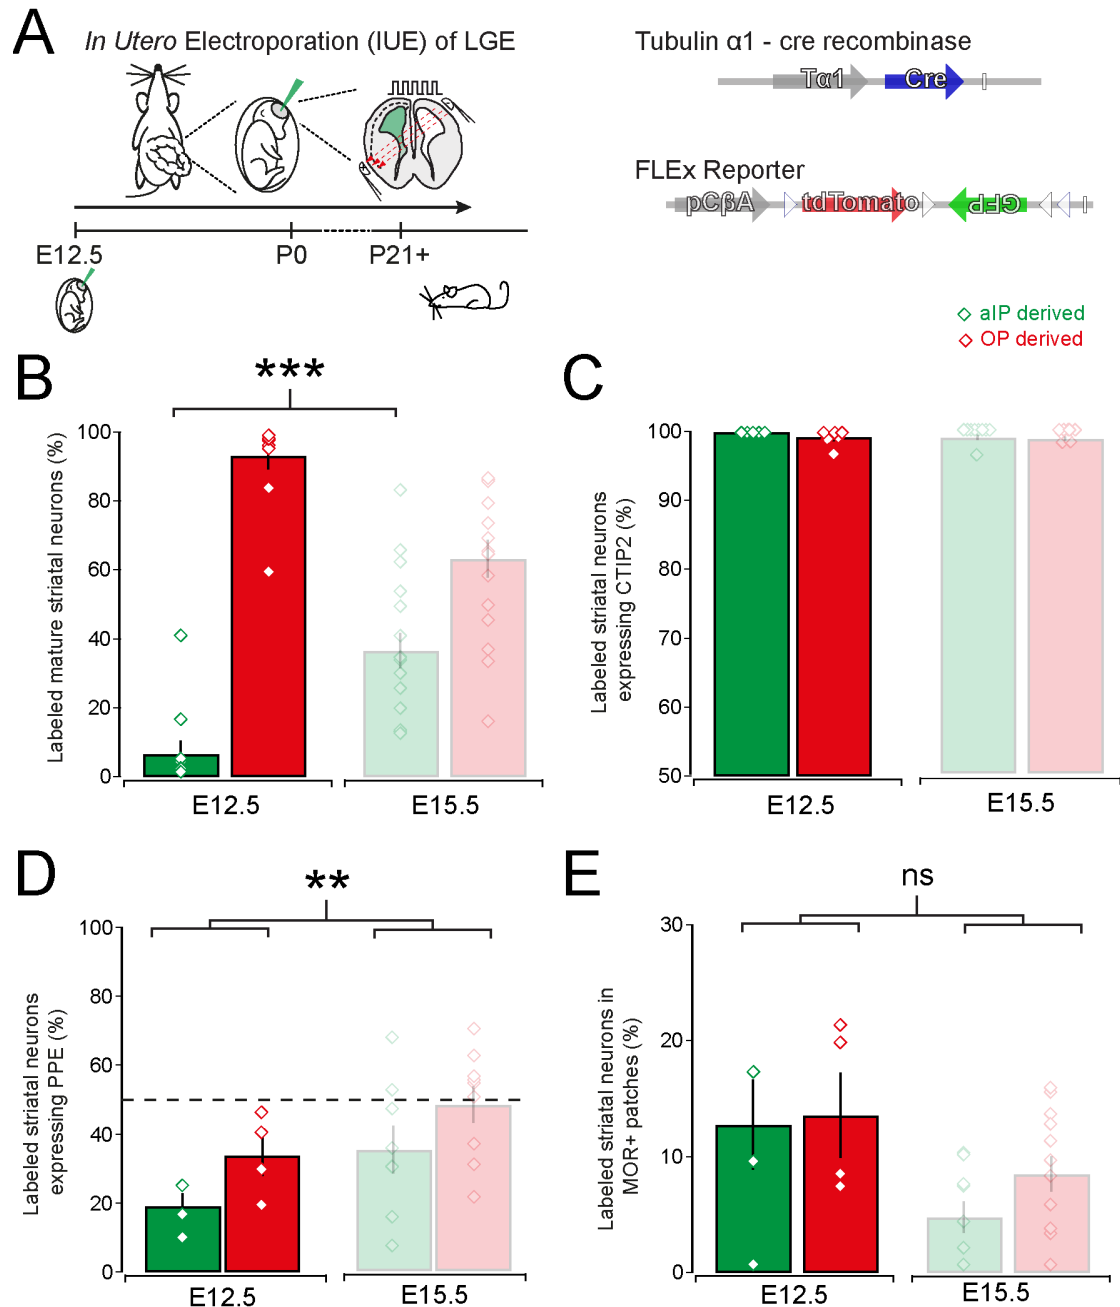

1368

1369

1370

**Supplementary Figure 3: Labeled aIP and OP derived striatal neurons after IUE**

**during early stages of neurogenesis.** (A) Animals that underwent IUE at E12.5 with

Ta1-cre and FLEX reporter plasmids were left to mature until young adulthood

(P21+) (B) Significantly more aIP derived neurons are generated using IUE at E15.5

than at E12.5 (E12.5:  $6.6 \pm 4.0\%$  and E15.5:  $36.7 \pm 5.5\%$ , Mann-Whitney test,

$p=0.0002$ ,  $n = 10$  and  $16$  brains). (C) IUE at both E12.5 and E15.5 generate mostly

striatal CTIP<sup>+</sup> neurons. (D) There is no significant difference in the production of

PPE<sup>+</sup>/D2 SPNs by aIP or OP progenitors at E12.5 or E15.5. However, grouping all

labeled neurons together at E12.5 a smaller proportion of PPE<sup>+</sup>/D2 SPNs is labeled at

this early stage of neurogenesis (E12.5 vs. E15.5, Mann-Whitney test;  $p = 0.006$ ;  $n =$

$4$  and  $9$  brains). (E) There is a trend towards more labeled neurons in the patch

compartments after IUE at E12.5 (E12.5:  $12.4 \pm 2.4\%$  vs. E15.5:  $6.9 \pm 1.3\%$  in

MOR<sup>+</sup> patches; Mann-Whitney test,  $p = 0.170$ ,  $n = 4$  and  $12$ ).

1382

1383  
1384  
1385  
1386  
1387  
1388  
1389  
1390  
1391  
1392  
1393  
1394  
1395  
1396  
1397  
1398  
1399  
1400

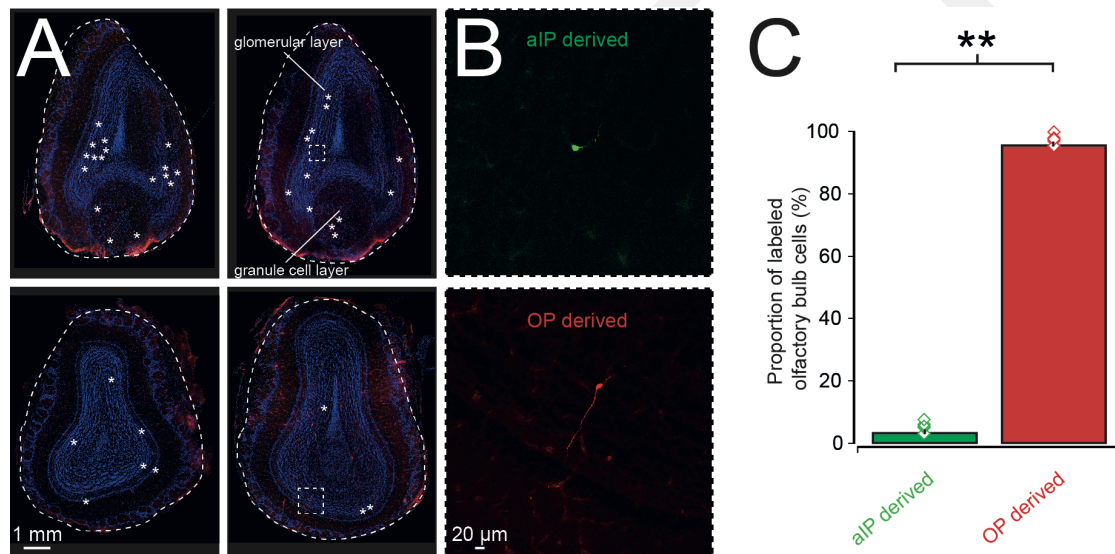

1401  
1402  
1403  
1404  
1405  
1406  
1407  
1408  
1409  
1410  
1411  
1412

**Supplementary Figure 4: IUE of LGE neural progenitors also labels a small number of olfactory bulb cells.** (A) Example images of 4 different olfactory bulbs with labeled neurons indicated by asterisks. (B) High magnification image of an aIP derived cell (top) and an OP derived cell (bottom) in the olfactory bulb. (C) The majority of labeled cells in the olfactory bulb are OP derived (aIP derived:  $3.9 \pm 1.6\%$  and OP derived:  $96.1 \pm 1.6\%$ ,  $p=0.0079$ , Mann-Whitney test,  $n = 5$  brains).
